1

2

3

4 Identifying bias in models that detect vocal fold paralysis from audio  
5 recordings using explainable machine learning and clinician ratings

6 Daniel M. Low<sup>1,2</sup>, Vishwanatha Rao<sup>3,4</sup>, Gregory Randolph<sup>4,5</sup>, Phillip C. Song<sup>4,5</sup>\*,

7 Satrajit S. Ghosh<sup>1,2,5</sup>\*

8

9

10

11<sup>1</sup> Program in Speech and Hearing Bioscience and Technology, Harvard Medical School, Boston,  
12 MA, USA

13<sup>2</sup> McGovern Institute for Brain Research, MIT, Cambridge, MA, USA

14<sup>3</sup> Department of Biomedical Engineering, Columbia University, New York, NY, USA

15<sup>4</sup> Department of Otolaryngology–Head and Neck Surgery, Massachusetts Eye and Ear Infirmary,  
16 Boston, MA, USA

17<sup>5</sup> Department of Otolaryngology–Head and Neck Surgery, Harvard Medical School, Boston, MA,

18 USA

19 \* Equal contribution

**20 Corresponding author**

21 Correspondence can be addressed to Daniel M. Low, Office: 46-4033F, 43 Vassar St,

22 Cambridge, MA 02139, USA. E-mail: [dlow@mit.edu](mailto:dlow@mit.edu).

23

24

25

26

## Abstract

27 **Introduction.** Detecting voice disorders from voice recordings could allow for frequent, remote,  
28 and low-cost screening before costly clinical visits and a more invasive laryngoscopy  
29 examination. Our goals were to detect unilateral vocal fold paralysis (UVFP) from voice  
30 recordings using machine learning, to identify which acoustic variables were important for  
31 prediction to increase trust, and to determine model performance relative to clinician  
32 performance.

33 **Methods.** Patients with confirmed UVFP through endoscopic examination (N=77) and controls  
34 with normal voices matched for age and sex (N=77) were included. Voice samples were elicited  
35 by reading the Rainbow Passage and sustaining phonation of the vowel "a". Four machine  
36 learning models of differing complexity were used. SHapley Additive exPlanations (SHAP) was  
37 used to identify important features.

38 **Results.** The highest median bootstrapped ROC AUC score was 0.87 and beat clinician's  
39 performance (range: 0.74 – 0.81) based on the recordings. Recording durations were different  
40 between UVFP recordings and controls due to how that data was originally processed when  
41 storing, which we can show can classify both groups. And counterintuitively, many UVFP  
42 recordings had higher intensity than controls, when UVFP patients tend to have weaker voices,  
43 revealing a dataset-specific bias which we mitigate in an additional analysis.

44 **Conclusion.** We demonstrate that recording biases in audio duration and intensity created  
45 dataset-specific differences between patients and controls, which models used to improve  
46 classification. Furthermore, clinician's ratings provide further evidence that patients were

47 over-projecting their voices and being recorded at a higher amplitude signal than controls.

48 Interestingly, after matching audio duration and removing variables associated with intensity in

49 order to mitigate the biases, the models were able to achieve a similar high performance. We

50 provide a set of recommendations to avoid bias when building and evaluating machine learning

51 models for screening in laryngology.

52 **Keywords:** vocal fold paralysis, acoustic analysis, voice, speech, explainability, interpretability,

53 machine learning, bias

54

55

56

57

## 58 INTRODUCTION

59 Voice recordings provide a rich source of information related to vocal tract physiology  
60 and human physical and mental health. Given advances in smartphones and  
61 wearables, these recordings can be made anytime and anywhere. Thus the search for  
62 disorder-specific acoustic biomarkers has been gaining momentum. Voice biomarkers  
63 have been reported for detecting Parkinson's disease (1) as well as psychiatric  
64 disorders including depression, schizophrenia, and bipolar disorder (for a systematic  
65 review, see Low et al, 2020 (2)). Given our scientific understanding of the complexity of  
66 speech production, multiple acoustic features have been devised for use in machine  
67 learning models. In Figure 1, we describe a schematic of speech production and the  
68 process of extracting certain acoustic features from an audio signal (see also Quatieri,  
69 2008 (3)), which is an important part of explaining how pathophysiology would affect  
70 acoustic features that are used in machine learning classifiers. Panel (A) depicts speech  
71 as the result of the neural coordination of three subsystems: the respiratory system  
72 (lungs), the laryngeal system (vocal folds), and the resonatory system of the vocal tract  
73 (pharynx, oral cavity, nasal cavity, articulators, and subglottal effects). Speech  
74 production requires air flow from the lungs to generate sound sources that are filtered  
75 by the vocal tract. Panel (B) captures the fact that environmental, microphone, and  
76 digital sampling characteristics (e.g., background noise, microphone gain, sampling  
77 rate) can affect acoustic features. Panel (C) shows the waveform of the audio signal,  
78 representing areas of compression (positive amplitude; higher air pressure) and

79 rarefaction (negative amplitude; lower air pressure). Higher amplitudes can lead to  
80 higher perceived loudness. Prosodic features arise from changes over longer segments  
81 of time, which is perceived in the rhythm, stress, and intonation of speech. A segment of  
82 the waveform is shown in the right panel, indicating a periodic signal from the vocal  
83 folds. Panel (D) shows that for a given time window, a spectrum (right panel) can be  
84 obtained through a fast Fourier transform (FFT) which represents the magnitude of the  
85 frequencies in the signal with peaks (formants F1–F3) due to vocal tract filtering of the  
86 source signal produced by the vocal folds. The spectrogram (left panel) is a  
87 representation of the spectrum as it varies over time and can be obtained through a  
88 short-term Fourier transform (STFT). The approximate location of the F0 and first  
89 formants are displayed. Finally, (E) It is possible to separate source and filter  
90 components by computing the inverse FFT of the log of the magnitude of the spectrum,  
91 called the cepstrum (right panel). The peak in the cepstrum reflects the periodic glottal  
92 fold vibration while lower quefrequency components reflect properties of the resonatory  
93 subsystem. For speech recognition, Mel filters are applied to the spectrum to better  
94 approximate human hearing. A conversion of the Mel-spectrum to a cepstrum using a  
95 Discrete Cosine Transform (DCT) generates mel-frequency cepstral coefficients  
96 (MFCCs). Similar to the cepstrum, lower MFCCs track vocal-tract filter information.

97

98

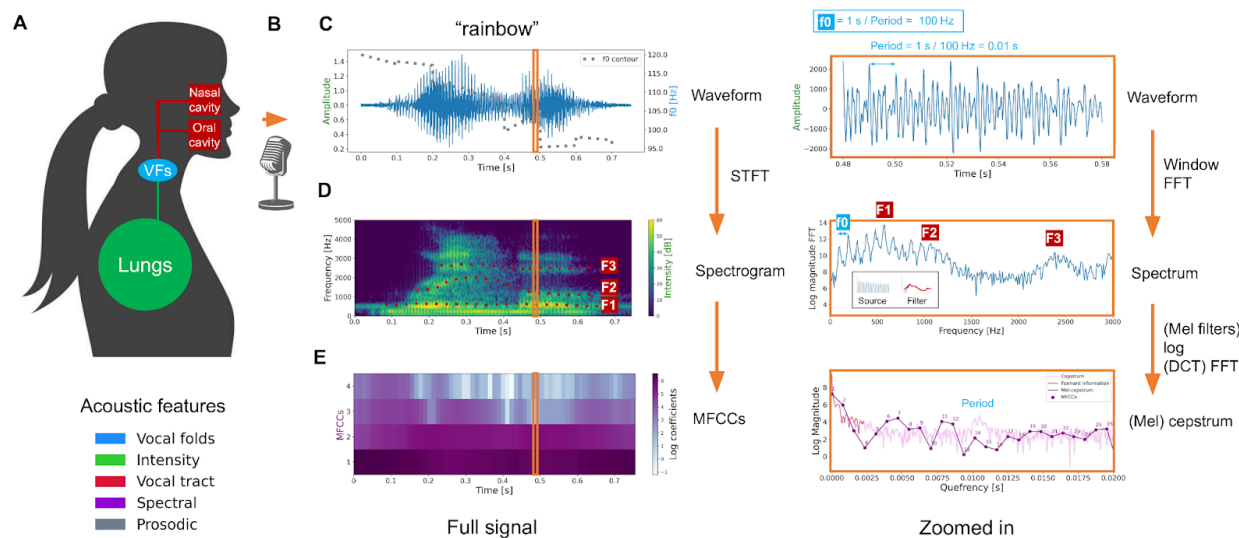

99

**100 Figure 1. Schematic of speech production and the process of extracting certain acoustic features**  
**101 from an audio signal.**

**102 (A)** Speech production, **(B)** recording characteristics, **(C)** waveform of audio signal with fundamental  
**103 frequency (f0)**, **(D)** spectrogram with formants F1-F3 and intensity, **(E)** mel-frequency cepstral coefficients  
**104 (MFCCs)**. Full description in the main text.

**105** Furthermore, while machine learning (ML) can be a powerful and successful approach  
**106** for diagnostics, they are often treated as "black-boxes". It can be difficult to determine  
**107** how the model is making a decision, that is, how it is combining input features from a  
**108** given patient to generate a prediction. This is particularly worrisome given ML  
**109** algorithms can detect and associate unintended or clinically irrelevant relationships and  
**110** introduce bias that may be difficult to anticipate. Explainable ML refers to a series of  
**111** methods and quantitative analyses for uncovering and "explaining" the rationale behind  
**112** the decision made by complex algorithms, which is particularly critical in the high-stake  
**113** decisions of medicine to increase trust among clinicians and patients (4).

**114** There are many challenges for applying acoustic analysis to detect specific disorders.

**115** Voice characteristics are highly varied and change over time. Laryngeal pathology, age,

116 gender, size, weight, general state of health, smoking/vaping, and medications can  
117 impact vocal acoustic characteristics. Diseases in the larynx and phonatory system (i.e.,  
118 larynx, resonating structures, lungs) and/or neurological system, will also affect voice.  
119 Compensatory production strategies and environmental conditions can also change the  
120 vocal signal. Furthermore, because hoarseness is such a frequent occurrence and  
121 specialty voice centers are rare, vocal fold disorders are often undiagnosed,  
122 under-reported, or misdiagnosed (5).

123 We chose vocal fold paralysis as the study cohort for several reasons. First, it is  
124 clinically important. UVFP can have detrimental effects on voice and quality of life with  
125 resultant morbidity related to respiration, swallowing and aspiration (6). Vocal fold  
126 paralysis may occur due to iatrogenic injury, malignancy, idiopathic, and neurological  
127 disease (7). Overall, surgical iatrogenic injury accounts for 46% of all UVFP in adults  
128 and thyroid and parathyroid surgeries are responsible for 32% of postsurgical UVFP (8).  
129 There is a significant need for a screening tool for the diagnosis and tracking of UVFP  
130 because of the high impact of this condition on productivity and quality of life. Screening  
131 could be done remotely and frequently, especially when surgical specialists and  
132 laryngeal exams are not readily accessible due to geographical, financial, and other  
133 barriers (9). Using an explainable ML model as a screening tool for UVFP can provide  
134 greater clarity as to who most needs laryngoscopy and provides insight in the key voice  
135 characteristics related to the pathophysiology (10–14). The costs associated with UVFP  
136 not only relate to patient morbidity and diminished quality of life but also to the economic  
137 burden placed on our healthcare system. Greater lengths of hospitalization and



138 increased hospital costs have been associated with postsurgical VFP (15,16). Access to  
139 specialists for diagnosis is limited and early detection and management of UVFP appear  
140 to improve length of stay and surgical outcomes (17). Special consideration should be  
141 given to what the model can actually classify: a model that generalizes well in  
142 classifying UVFP from controls may not be able to screen for UVFP out of other voice  
143 disorders, but could be used to monitor UVFP patients remotely and affordably during  
144 treatment or detect risk for UVFP when it is the most likely cause such as dysphonia  
145 after thyroid surgery.

146 Furthermore, UVFP is an ideal model for demonstrating the explainability of ML. UVFP  
147 occurs when the mobility of a single vocal fold is impaired as a consequence of  
148 neurological injury and diagnosis is consistently verified through routine laryngoscopy;  
149 therefore, ground truth labels are available. Second, the clinical signs of UVFP are  
150 well-described. These characteristics include a weak, breathy voice quality, early vocal  
151 fatigue, reduced cough strength, and aspiration with thin liquids (18,19). Therefore, the  
152 acoustic differences between UVFP patients and healthy controls can be interpreted  
153 with regards to perceptual symptoms and a well-understood pathophysiology. In  
154 contrast, explaining important variables to predict a disorder which is hard to diagnose  
155 (e.g., has low inter-rater reliability) and has an unclear pathophysiology would ironically  
156 result in a poor explanation, because it would be puzzling how or even if the disorder  
157 could modulate the important acoustic variables. Of course, machine learning models  
158 can also offer novel explanations into a disorder by characterizing novel characteristics.  
159 However, if these models use high-dimensional feature vectors, they are more likely to

160 overfit when using small datasets (20,21), which should lead to more skepticism of  
161 these novel explanations.

162 There have been several studies detecting unilateral vocal fold paralysis (UVFP) using  
163 machine learning (22–30); however, most have included the disorder among a set of  
164 voice disorders to be predicted. Limitations of these prior studies could be seen to fall  
165 into one of following types: not reporting the performance when classifying the subset of  
166 participants with UVFP out of the participants with dysphonia they were trying to detect;  
167 small sample sizes given most studies contained 10 participants with UVFP or fewer  
168 with one study containing 50 participants (31); a lack of algorithmic explanations: they  
169 either do not report on the relative importance of each acoustic variable; use input data  
170 such as a spectrogram in a black-box deep learning model which could make attempts  
171 at algorithmic explanations on images such as saliency maps more opaque than results  
172 from feature importance of handcrafted features; use a black-box model such as neural  
173 network without attempting to explain its predictions with deep learning explainability  
174 methods (32); use a single type of model which may pick up on certain types of patterns  
175 but miss others leading to incomplete conclusions on feature importance; use only a few  
176 features which may impede better predictive performance by not capturing certain  
177 relevant information; and/or not publicly share models or data to help test their  
178 generalizability to new data.

179 The objectives of our study were: to detect UVFP using ML; to evaluate the  
180 effectiveness of different models in differentiating the acoustic signals between patients

181 with UVFP and patients with normal functioning vocal folds (i.e., controls); to explain  
182 which features are most important to the diagnostic models and examine the  
183 pathophysiological relevance; and to compare performance to human clinicians  
184 evaluating audio recordings. To achieve these objectives, we evaluated four different  
185 classes of machine learning algorithms to assess classification performance, obtained  
186 the minimal set of features necessary for detection, and identified the most important  
187 acoustic features for model construction after removing redundant features. Ultimately,  
188 we wanted to see if the most important features identified by the machine learning  
189 models matched clinically-known relevant acoustic changes.

190

## 191 **MATERIALS AND METHODS**

192 This study was approved by the Institutional Review Board at Massachusetts Eye and  
193 Ear Infirmary and Partners Healthcare (IRB 2019002711).

### 194 **Participants and voice samples**

195 Through retrospective chart analysis from 2009 to 2019, a total of 1043 patient charts  
196 were reviewed from a tertiary care laryngology practice who underwent endoscopic  
197 evaluation and voice testing. Of those, 53 patients with confirmed UVFP were identified.  
198 They had documented vocal fold paralysis by endoscopic examination and had  
199 undergone acoustic analysis as part of routine clinical care. Each patient had four

200 acoustic recordings. These included three sustained vocalizations of the "a" vowel  
201 sound (ɑ in the International Phonetic Alphabet) and a reading of the introductory  
202 paragraph of the rainbow passage (33). The acoustic recordings were all taken in an  
203 acoustically shielded room. For each of these 53 patients, a board-certified  
204 otolaryngologist reviewed their clinical history, video laryngoscopy as well as their audio  
205 samples to confirm that they were correctly classified to have UVFP. Voice samples  
206 from an additional 24 patients were collected prospectively using a mobile software,  
207 OperaVOX™ on an iPad, who were being treated for UVFP. These patients also had  
208 the same four acoustic recordings as the patients from retrospective chart review. This  
209 combination of data collection yielded a total of 77 UVFP patients for analysis, of which  
210 48 had left UVFP and 29 right UVFP.

211 All of the patients were then matched with control samples from a database of patients  
212 without UVFP who had also undergone acoustic analysis. Each control was the same  
213 sex and had the same smoking status as the UVFP patient and within three years of  
214 age, and had documented laryngeal examinations that verified the absence of vocal fold  
215 mucosal pathology. The controls were excluded if they had established laryngeal  
216 surgery, vocal fold lesions, radiation, head and neck cancer, or neurological disease.  
217 The controls had recorded the same four acoustic recordings as the retrospectively  
218 gathered UVFP group. A board-certified otolaryngologist confirmed that the voice  
219 recordings and video laryngoscopies of these controls matched normal expectancies.  
220 The reading samples were divided in thirds to match the amount of vowel production  
221 samples, resulting in 6 samples for most participants. Reading recordings were not

222 available for three patients and three patient vowel samples were removed due to  
223 containing multiple vowel productions or a cough. The final dataset that was analyzed is  
224 described in Table 1. Reading+vowel refers to including all samples (i.e., ~6 samples)  
225 from the same participant with the goal of either obtaining higher performance or  
226 discovering features that show variation in relation to diagnosis consistently across  
227 tasks. Mean (SD) audio lengths were 6.81s (5.47) for reading samples and 3.95s (1.00)  
228 for vowel samples. The audio samples were processed using OpenSmile with the  
229 eGeMAPS configuration file (article (34), source code (35)) which applies different  
230 summarization statistics to the time series depending on the feature resulting in 88  
231 features per sample covering information related to the vocal folds (F0, jitter, shimmer),  
232 intensity (loudness, HNR), vocal tract (F1–3 frequency, bandwidth, amplitude), spectral  
233 balance (alpha ratio, Hammamberg index, spectral slope, MFCC 1–4, spectral flux), and  
234 prosody (voice and unvoiced segments, loudness peaks per second). See section  
235 "eGeMAPS features" in Sup. Mat. for full list.

236 **Table 1. Sample sizes and demographic information**

|                       | UVFP        | Controls    | Total       |
|-----------------------|-------------|-------------|-------------|
| N                     | 77          | 77          | 154         |
| Mean age (SD)         | 56.4 (18.7) | 56.6 (18.8) | 56.5 (18.7) |
| Sex (F/M)             | 39/38       | 39/38       | 78/76       |
| Reading               | 222         | 231         | 453         |
| Vowel                 | 227         | 231         | 458         |
| Reading+vowel (total) | 449         | 462         | 911         |

237 SD: standard deviation; F: female; M: male.

## 238 **Machine learning models of increasing complexity**

239 With the goal of classifying voices recording into either UVFP or controls, we used four  
240 machine learning algorithms of increasing complexity from the *scikit-learn* (v0.21.3)  
241 using the *pydra-ml* (v0.3.1) toolbox (36) (default parameters were used unless  
242 otherwise specified). By complexity we mean models are more complex if they are  
243 harder to simulate, that is, harder to take the input data and model parameters and step  
244 through every calculation required to produce a prediction in a reasonable time which  
245 increases with the amount of parameters and interactions (37).

246 (1) Logistic Regression: a simple linear model that is constrained to use few features  
247 due to an L1 penalty making it the simplest model (“liblinear” solver was used which is  
248 ideal for smaller datasets).

249 (2) Stochastic Gradient Descent (SGD) Classifier: we used a log loss which implements  
250 a logistic regression; therefore, it is also a linear model but tends to use more features  
251 due to an elastic net penalty, making it slightly more complex (the `max_iter` parameter  
252 was set to 5000 and `early_stopping` was set to True).

253 (3) Random Forest: it is an algorithm that uses simpler decision trees (i.e., weak  
254 learners) on feature subsets "but then takes the majority of the votes of the decision  
255 trees' predictions to create a stronger learner, making it harder to interpret which  
256 features are important across trees.

257 (4) Multi-Layer Perceptron: it is a neural network classifier which incorporates, in our  
258 case, 100 instances of perceptrons (artificial neurons), which are connected to each  
259 input feature through weights with a ReLU activation function to capture nonlinear  
260 relationships in the data. It is not possible to know exactly how the hundreds of internal  
261 weights interact to determine feature importance, making the model difficult to interpret  
262 directly from its parameters (the `max_iter` parameter was set to 1000; `alpha` or the L2  
263 penalty parameter was set to 1).

264 To generate independent test and train data splits, a bootstrapped group shuffle split  
265 sampling scheme was used. Bootstrapping is more optimal than cross-validation on  
266 smaller datasets and provides a measure of uncertainty through a confidence interval  
267 (38). For each iteration of bootstrapping, a random selection of 20% of the participants,  
268 balanced between the two groups, was used to create a held-out test set. The  
269 remaining 80% of participants were used for training. This process was repeated 50  
270 times, and the four classifiers were fitted and tested for each test/train split.. We used  
271 the default of 50 bootstrapping splits from `pydra-ml` to reduce computational time.  
272 Median ROC AUC stabilized to larger split values at around 40 splits for logistic  
273 regression models across tasks (see Sup. Mat. Figure S1) while reducing runtime  
274 compared to larger split values. The Area Under the Receiver Operating Characteristic  
275 Curve (ROC AUC; perfect classification = 1; chance = 0.5) was computed to evaluate  
276 the performance of the models on each bootstrapping iteration, resulting in a distribution  
277 of 50 ROC AUC scores for each classifier. To ensure results were not due to choosing  
278 `scikit-learn`'s hyperparameter default settings, hyperparameter tuning was performed on

279 the main models using all features and achieved similar performance to non-fine-tuned  
280 models (see Sup. Mat. Table S1). The focus of our study is identifying bias and not  
281 achieving –in our case– a small increment in performance; therefore, given the large  
282 number of models, analyses, and bootstrapping samples in our study which focuses on  
283 identifying bias, we chose default parameters given the small changes in performance  
284 we observed with hyperparameter tuning. Additionally, for each iteration, each classifier  
285 was trained with randomized patient/control labelings to generate a null distribution of  
286 ROC AUC scores (i.e., a permutation test). Each model's performance was statistically  
287 compared to their null model's distribution using an empirical p-value, a common and  
288 effective measure for evaluating classifier performance (see Definition 1 in (39)). The  
289 significance level was set to  $\alpha = 0.05$ .

## 290 **Assessing feature importance**

291 Kernel SHAP (SHapley Additive exPlanations) was used to determine which acoustic  
292 features were most important for each model to detect UVFP. This method is model  
293 agnostic in that it can take any trained target model (even “black box” neural networks)  
294 and compute feature importance (40). It does so by performing regression with L1  
295 penalty between different sets of input features and a single prediction made by the  
296 target model. It then uses the coefficients of the additional regression model as a  
297 measure of feature importance for a single prediction. We took the average of the  
298 absolute SHAP values across all test predictions (positive and negative values are both  
299 important for classification). We then weighted the average values by the model's



300 median performance since an important feature for a bad model could be a less  
301 important feature for a good model and vice versa. Since we trained each model 50  
302 times (i.e., one for each bootstrapping split), we computed the mean SHAP values  
303 across splits for each model. This pipeline (i.e., machine learning models, bootstrapping  
304 scheme, SHAP analysis) was done using *pydra-ml*.

## 305 **Reducing collinearity to do explainability analysis using**

### 306 **Independence Factor**

307 Highly correlated features (i.e., collinearity) can influence model generation and  
308 interpretation. Two models may obtain similar performance while using different features  
309 or placing different weights on the same features (i.e., underspecification (20,41)). This  
310 makes it difficult to compare algorithmic explanations across models. For instance,  
311 mean F1 frequency may be less important to a given model because the model uses  
312 mean F2 frequency which happens to capture very similar information in a particular  
313 dataset (i.e., has a high correlation), whereas a different model may use F1 instead of  
314 F2 or use both but assign less importance to each and still obtain the same  
315 performance. To enforce models to use the same features that capture very similar  
316 information and be able to compare feature importance across models, we kept a single  
317 feature out of the sets of features that share similar information above a given threshold.

318 We used a custom algorithm we call Independence Factor whereby for each  
319 feature in alphabetical (i.e., arbitrary) order, we removed features that show strong

320 dependence above a given threshold. The step was repeated for remaining features.  
321 We use distance correlation from the Python *dcor* package (v0.4) because, unlike  
322 Pearson *r* or Spearman *rho*, it can capture non-monotonic relationships (42,43). We  
323 have included several examples of non-monotonic associations between variables in  
324 our dataset that would be captured better by *dcor* (see Sup. Mat. Figure S2). We used  
325 the following threshold values for the distance correlation [1.0, 0.9, 0.8, 0.7, 0.6, 0.5,  
326 0.4, 0.3, 0.2] to compute the Independence Factor, which removed increasingly more  
327 features (i.e., 1.0 keeps all features and 0.2 removes features that have a distance  
328 correlation above 0.2). We chose the feature size which contains at least one model  
329 that scores within three percentage points of the performance using all features, with  
330 the goal of obtaining a more parsimonious model for subsequent explanation while  
331 maintaining high accuracy. Thus, removing redundant features makes the models  
332 easier to interpret for clinical relevance. To visualize the original redundancy across  
333 features, we computed clustermaps using *seaborn* package (v0.10.1) performing  
334 hierarchical clustering with the average-linkage method and Euclidean distance. This  
335 was performed on the pairwise distance correlation, computed separately on data from  
336 UVFP, controls, UVFP+controls and on reading, vowel, and reading+vowel.

337

### 338 **Performance using most important and least important features**

339 Studies tend to report and describe the top N features out of M features, but it is not  
340 clear what performance the model would obtain when using only those top N features;

341 perhaps it would perform substantially worse than the full model. We will report  
342 performance using only top 5 features as well as performance without top 5 features to  
343 provide a more realistic evaluation of their importance.

### 344 Performance using audio duration

345 Figure 2 indicates clear differences in the distributions of audio recording duration between  
346 UVFP patients and controls. This is due to how recordings were processed and saved and not  
347 necessarily due to an intrinsic property of UVFP (e.g., slower speech), which reveals a bias that  
348 models can leverage but is not expected to generalize well under different audio processing  
349 procedures. Therefore, we examine whether audio duration alone could perform well in  
350 classification of UVFP. The mean (and standard deviation) for the audio duration for reading  
351 task is 3.5 s (0.00 s) for the controls and 10.25 s (6.17 s) for the UVFP patients and the audio  
352 duration for sustained vowel task is 4.11 s (0.07 s) for the controls and 3.74 s (1.3 s) for the  
353 UVFP patients.

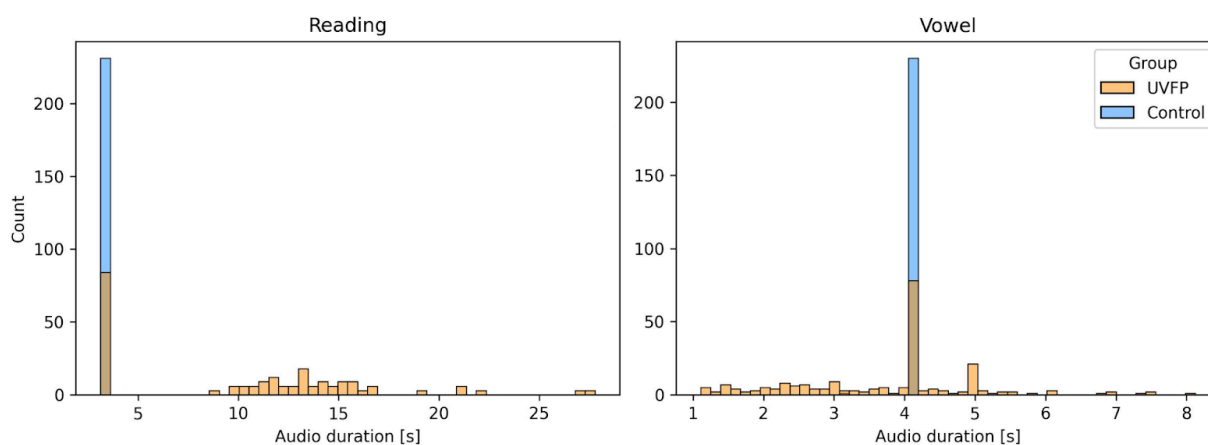

354

355 **Figure 2. Distribution of audio duration for reading and vowel tasks split by group reveals**

356 **a dataset bias.** The mode of the audio durations for the controls is 3.5 s for reading samples  
357 and 4.11 s for vowel samples.

358

359

360

### 361 **Performance using cepstral peak prominence**

362 To evaluate whether results are sensitive to choice of features, we use a different set of  
363 features derived from cepstral peak prominence (CPP) given it has been shown to be a  
364 good measure of breathiness and dysphonia (44,45). We match the summary statistics  
365 across the audio recording that eGeMAPS uses: CPP mean, CPP coefficient of  
366 variation (standard deviation normalized by the mean), CPP 20th percentile and CPP  
367 80th percentile. We use our custom Python implementation which matches MatLab's  
368 COVAREP output (46).

### 369 **Clinician ratings**

370 In order to corroborate whether there are unintended recording differences between  
371 UVFP patients and controls that may lead to bias, one otorhinolaryngologist and two  
372 speech-language pathologists rated each audio recording of the reading task (one per  
373 participant, not split in three) for the following variables (and possible responses), in  
374 order: background noise (None, Some, High); UVFP (yes, no), CAPE-V severity (0 to

375 100), CAPE-V roughness (0 to 100), CAPE-V breathiness (0 to 100), CAPE-V strain (0  
376 to 100), CAPE-V pitch (0 to 100), CAPE-V loudness (0 to 100; estimated loudness as if  
377 the rater were in the recording room), recording loudness (low, medium, high; loudness  
378 of the recording). Inter-rater agreement was assessed using intra-class correlation for  
379 all numerical variables and Light's  $k$  for the binary presence of UVFP (47) using the R  
380 package *irr* (v0.84.1) (48). The entire reading task was provided instead of the task split  
381 in three to make assignment easier for clinicians. The reading task was chosen over the  
382 sustained vowel because we expected it to be easier for clinicians to detect UVFP.

## 383 RESULTS

### 384 Performance of models using acoustic features

385 In Table 2, we report performance for models using all features, models after removing  
386 redundant features, models using only top 5 features (to understand their unique role in  
387 performance), models using all 88 features without 5 features (to understand whether  
388 the top 5 features are necessary for high performance), models using audio duration  
389 length, and models using a different feature set based on CPP. Performance was found  
390 to be high across most models except CPP-based models. Some of the models just  
391 using audio duration length were able to achieve close to the highest performance,  
392 which reflects the expected effect of the difference in the dataset. Given dependent  
393 features provide similar information (see Supplementary Figures S1, S2, S3, S4, S5,  
394 S6, S7, S8, and S9) and distort feature importance analyses, we then tested

395 performance after removing redundant features using the Independence Factor method  
396 previously described. Supplementary Figure S12 shows performance for different  
397 feature set sizes with increasing amounts of redundant features. From this analysis, we  
398 selected the feature-set size that resulted in best performance using the least amount of  
399 features for subsequent analyses: 39 features (reading), 13 (vowel), 19  
400 (reading+vowel). After removing related features (i.e., reducing collinearity) from the  
401 original 88 features, similar performance was obtained (median ROC AUC = 0.84–0.87)  
402 using fewer features. Supplementary Materials "Feature selection" section describes an  
403 analysis of how this method compares to removing features across each train set (see  
404 Sup. Mat. Table S1).

405

406

407

408

409 **Table 2. Model performance**

|               | Features   | LogisticRegression | MLP                | RandomForest       | SGDClassifier      |
|---------------|------------|--------------------|--------------------|--------------------|--------------------|
| Reading       | 88         | .87 (.78-.93; .50) | .87 (.80-.93; .50) | .87 (.76-.91; .49) | .83 (.76-.89; .50) |
| Vowel         | 88         | .84 (.77-.89; .50) | .86 (.79-.91; .50) | .86 (.79-.91; .51) | .80 (.72-.87; .50) |
| Reading+Vowel | 88         | .84 (.76-.91; .50) | .86 (.74-.92; .48) | .85 (.77-.92; .49) | .79 (.72-.86; .51) |
| Reading       | 39         | .84 (.76-.92; .50) | .83 (.76-.91; .50) | .87 (.77-.91; .51) | .78 (.71-.86; .51) |
| Vowel         | 13         | .80 (.70-.90; .50) | .81 (.74-.91; .50) | .84 (.75-.90; .52) | .74 (.58-.87; .51) |
| Reading+Vowel | 19         | .79 (.70-.84; .50) | .82 (.75-.88; .51) | .84 (.77-.91; .51) | .70 (.61-.77; .52) |
| Reading       | Top 5      | .81 (.73-.89; .50) | .86 (.78-.92; .47) | .85 (.77-.90; .50) | .75 (.56-.87; .57) |
| Vowel         | Top 5      | .78 (.67-.87; .50) | .82 (.74-.92; .53) | .81 (.72-.87; .50) | .72 (.57-.82; .49) |
| Reading+Vowel | Top 5      | .80 (.70-.86; .50) | .82 (.74-.88; .50) | .81 (.74-.89; .53) | .72 (.55-.83; .52) |
| Reading       | 88 - Top 5 | .85 (.76-.92; .50) | .87 (.77-.92; .49) | .85 (.77-.90; .52) | .82 (.71-.89; .51) |
| Vowel         | 88 - Top 5 | .84 (.75-.93; .50) | .86 (.72-.93; .51) | .84 (.74-.94; .52) | .80 (.70-.90; .48) |
| Reading+Vowel | 88 - Top 5 | .84 (.74-.89; .50) | .85 (.76-.91; .50) | .85 (.76-.91; .50) | .79 (.71-.87; .50) |
| Reading       | Duration 1 | .81 (.73-.88; .50) | .81 (.73-.88; .50) | .85 (.77-.93; .50) | .76 (.50-.88; .50) |
| Vowel         | Duration 1 | .70 (.61-.77; .50) | .80 (.70-.91; .51) | .86 (.76-.94; .52) | .50 (.31-.68; .51) |
| Reading+Vowel | Duration 1 | .70 (.64-.76; .50) | .76 (.67-.84; .50) | .86 (.73-.92; .50) | .64 (.45-.70; .50) |
| Reading       | CPP 4      | .76 (.64-.84; .50) | .76 (.64-.84; .46) | .71 (.64-.78; .55) | .74 (.60-.84; .50) |
| Vowel         | CPP 4      | .82 (.73-.90; .50) | .82 (.71-.90; .53) | .77 (.65-.85; .50) | .77 (.40-.86; .49) |
| Reading+Vowel | CPP 4      | .72 (.65-.80; .50) | .74 (.68-.84; .53) | .72 (.65-.78; .50) | .68 (.44-.78; .49) |

410 Performance of models using either all 88 features, non-redundant features (39, 13, 19), top five most  
 411 important features, all 88 features minus top 5 most important features using eGeMAPS features. We  
 412 then compared this to using just audio duration as well as a different feature set based on CPP. Median  
 413 ROC AUC score from 50 bootstrapping splits (90% confidence interval; median score of null model  
 414 trained on permuted labels which should be at .50 if at chance). For full distributions of scores see Figure

415 S11 in Supplementary Materials. Removing features is a post-hoc analysis because features were  
416 selected based on observing performance on the test sets, and therefore performance might be slightly  
417 overly optimistic and would need to be tested on an independent test set for further validation. MLP:  
418 Multi-Layer Perceptron; SGD: Stochastic Gradient Descent Classifier; CPP: Cepstral Peak Prominence.

419 The bootstrapped ROC AUC distributions and permutation tests for the reduced  
420 (parsimonious) models using the non-redundant feature set are shown in Figure 3.

421 Models distribution were all significantly different than their null distribution after  
422 correcting for multiple comparisons using a Benjamini-Hochberg procedure.

423

424



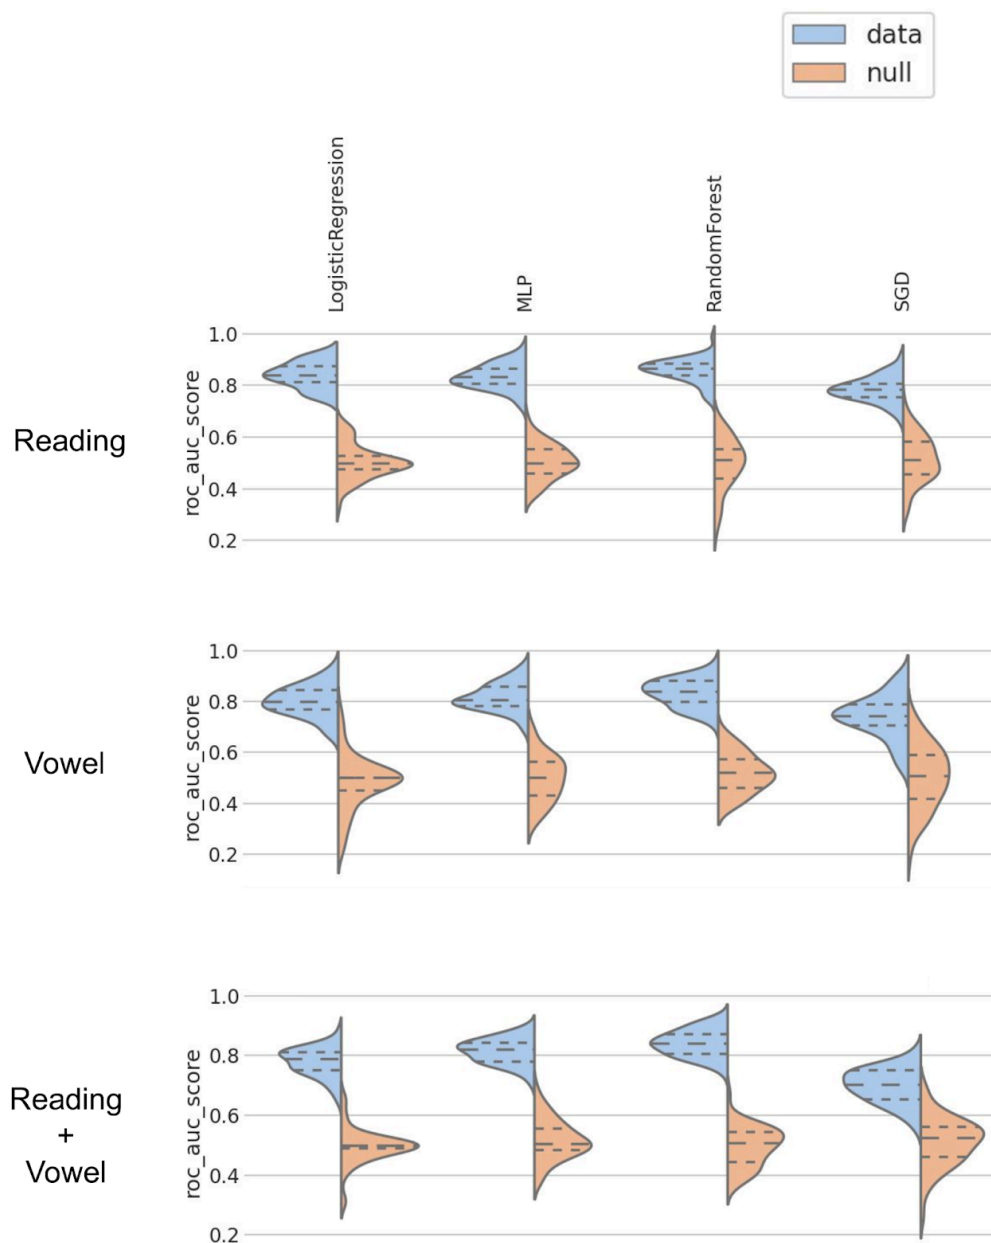

425

426 **Figure 3. Model performance comparison using a permutation test using non-redundant features.**

427 Scores from models trained on true labels (blue) and trained on permuted labels (orange) over

428 bootstrapping splits.

429

430 Given 24 UVFP patients were recorded with a different device, an iPad, we trained  
431 models without their samples to make sure these differences in recordings were not  
432 driving performance. There was a small drop in performance, which could be due to a  
433 bias (the full, original model using information of the recording device), but could also be  
434 due to removing training samples. The drop in performance is not large enough to  
435 suspect that differences in recording are driving the full original model's performance  
436 (see Sup. Mat. Table S2, Table S3, and analysis in Supplementary section  
437 "Performance removing participants that used other recording system").

### 438 **Assessing feature importance**

439 Figure 4 reports feature importance using SHAP for all models. For the reading-based  
440 models, all models tend to use the same top 5 features except SGD, which also has the  
441 lowest performance. For further description of features and the chosen classification of  
442 features, see Eyben et al. (2015) (34) and Low et al. (2020) (2). When reviewing  
443 important features, it is key to note that any of the features with which it is codependent  
444 or associated could be a reasonable important feature (see clusters of redundant  
445 features in Supplementary Figures S3-S11). The variance on feature importance rank is  
446 evidence that models can use different feature information and still obtain similar high  
447 –although not perfect– performance. We further display the distribution of each top  
448 feature and its individual performance in Figure 5, which shows that no single feature is  
449 enough to dissociate groups with high performance. This figure also revealed the bias:  
450 the intensity-related feature equivalent sound level was counterintuitively higher for

451 UVFP patients than controls. Figure 6 reports similarity between top 5 features and all  
452 original 88 eGeMAPS features. Features that have a high dcor or distance correlation  
453 (i.e., cluster) with top 5 features were not used in models to avoid redundancy, but still  
454 share similar information and can therefore be considered important features as well.  
455 Hierarchically-clustered heatmaps for other data types (vowel, reading, both) and  
456 groups (UVFP patients, controls, both) are displayed in Supplementary Figures S1, S2,  
457 S3, S4, S5, S6, S7, S8, and S9. Clustering tends to reflect pre-defined features types  
458 such as those reflecting patterns from vocal folds, intensity, vocal tract, spectral  
459 analyses, and prosody.

### Reading SHAP

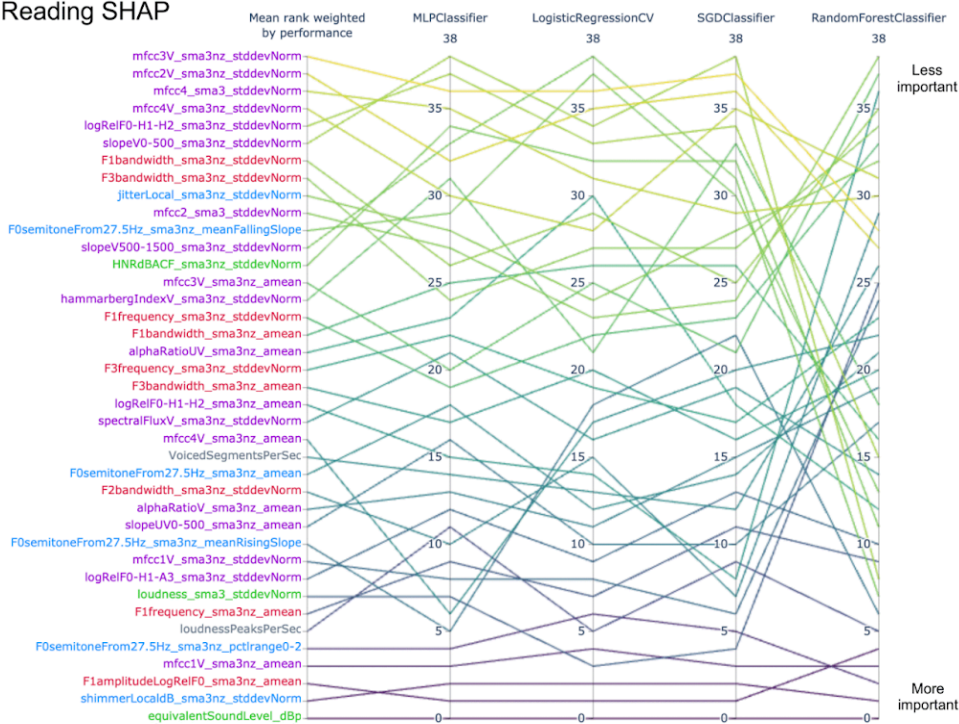

### Vowel SHAP

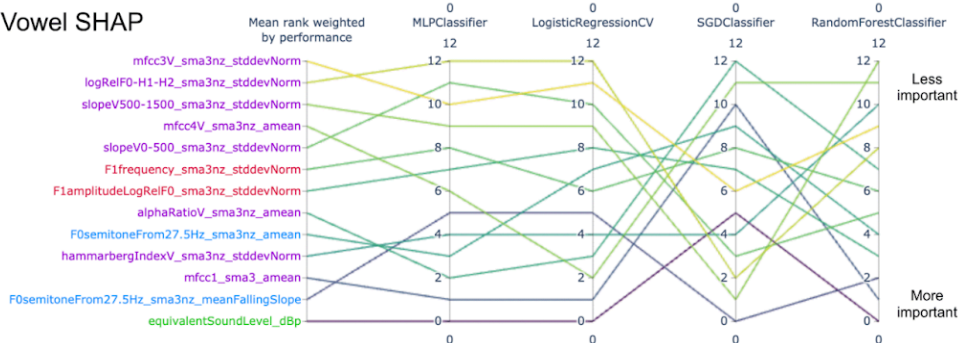

### Reading + Vowel SHAP

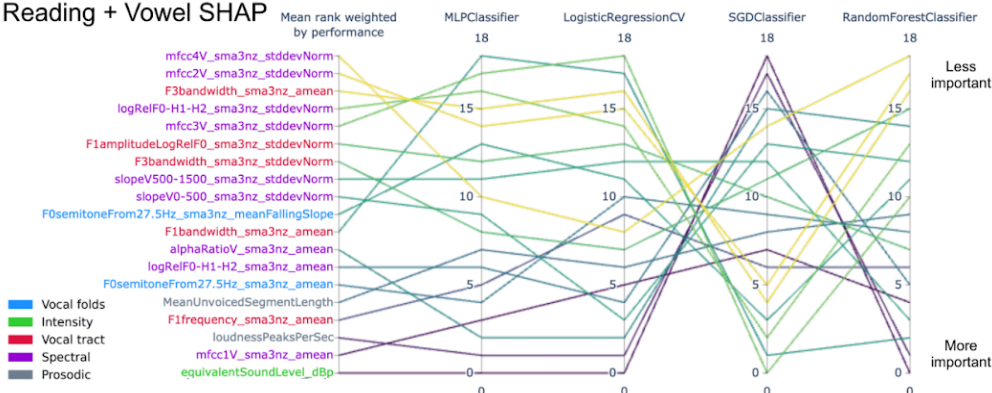

460

461 **Figure 4. Feature importance parallel coordinate plot.** Rank reads from bottom (most important) to top  
 462 (least important). Mean rank is weighted by performance of each model to avoid a lower performing model  
 463 biasing the mean rank.

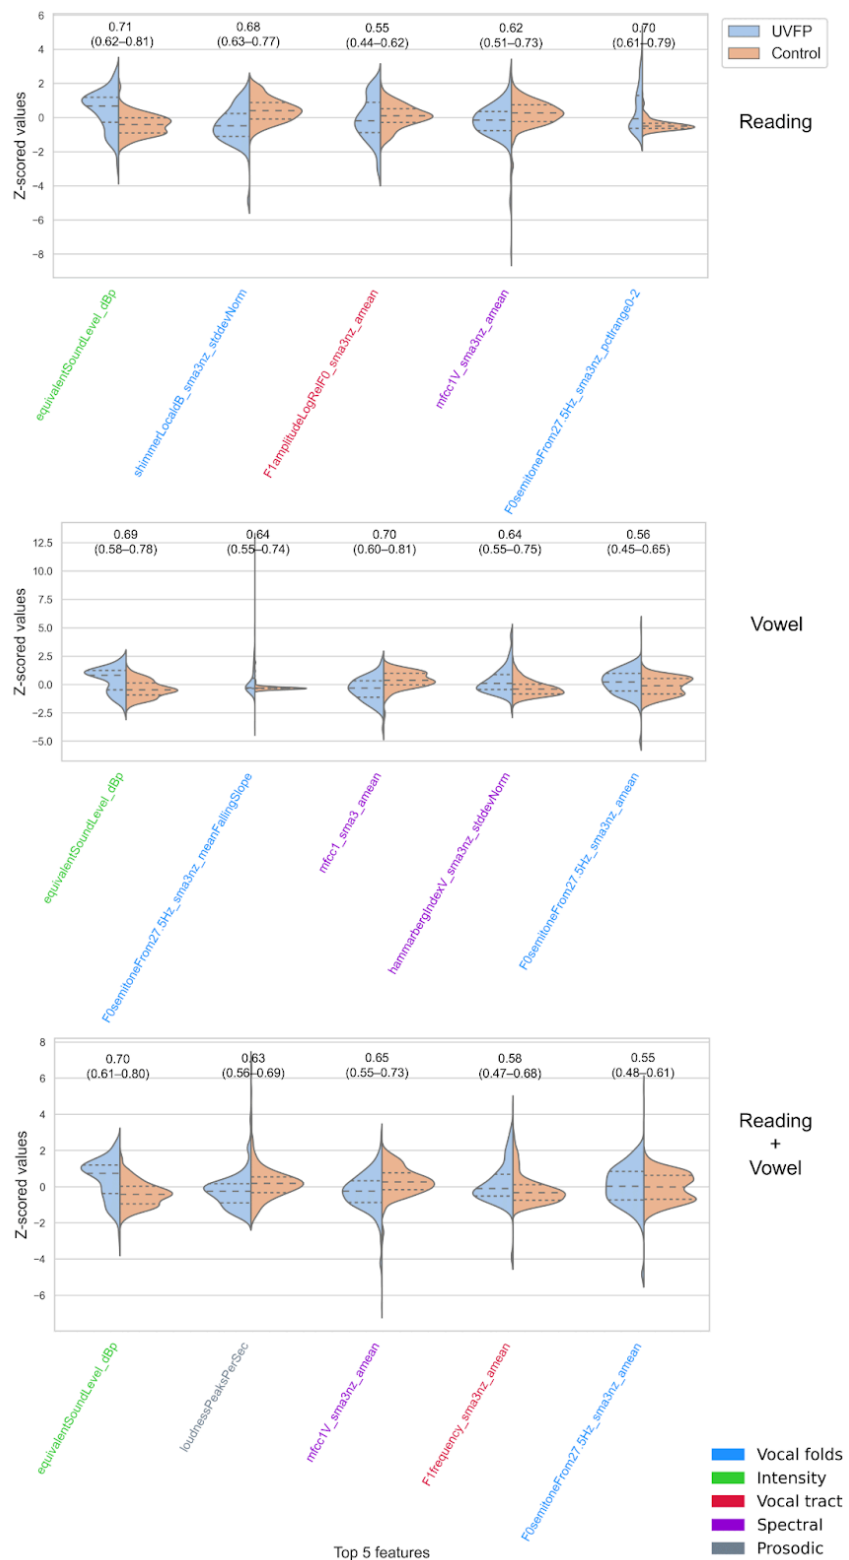

464

465 **Figure 5. Distributions for top 5 features and corresponding performance for single features.** Logistic  
 466 Regression with L1 penalty was used. No single feature is enough to dissociate groups with high  
 467 performance. Null models' median performance was 0.5.

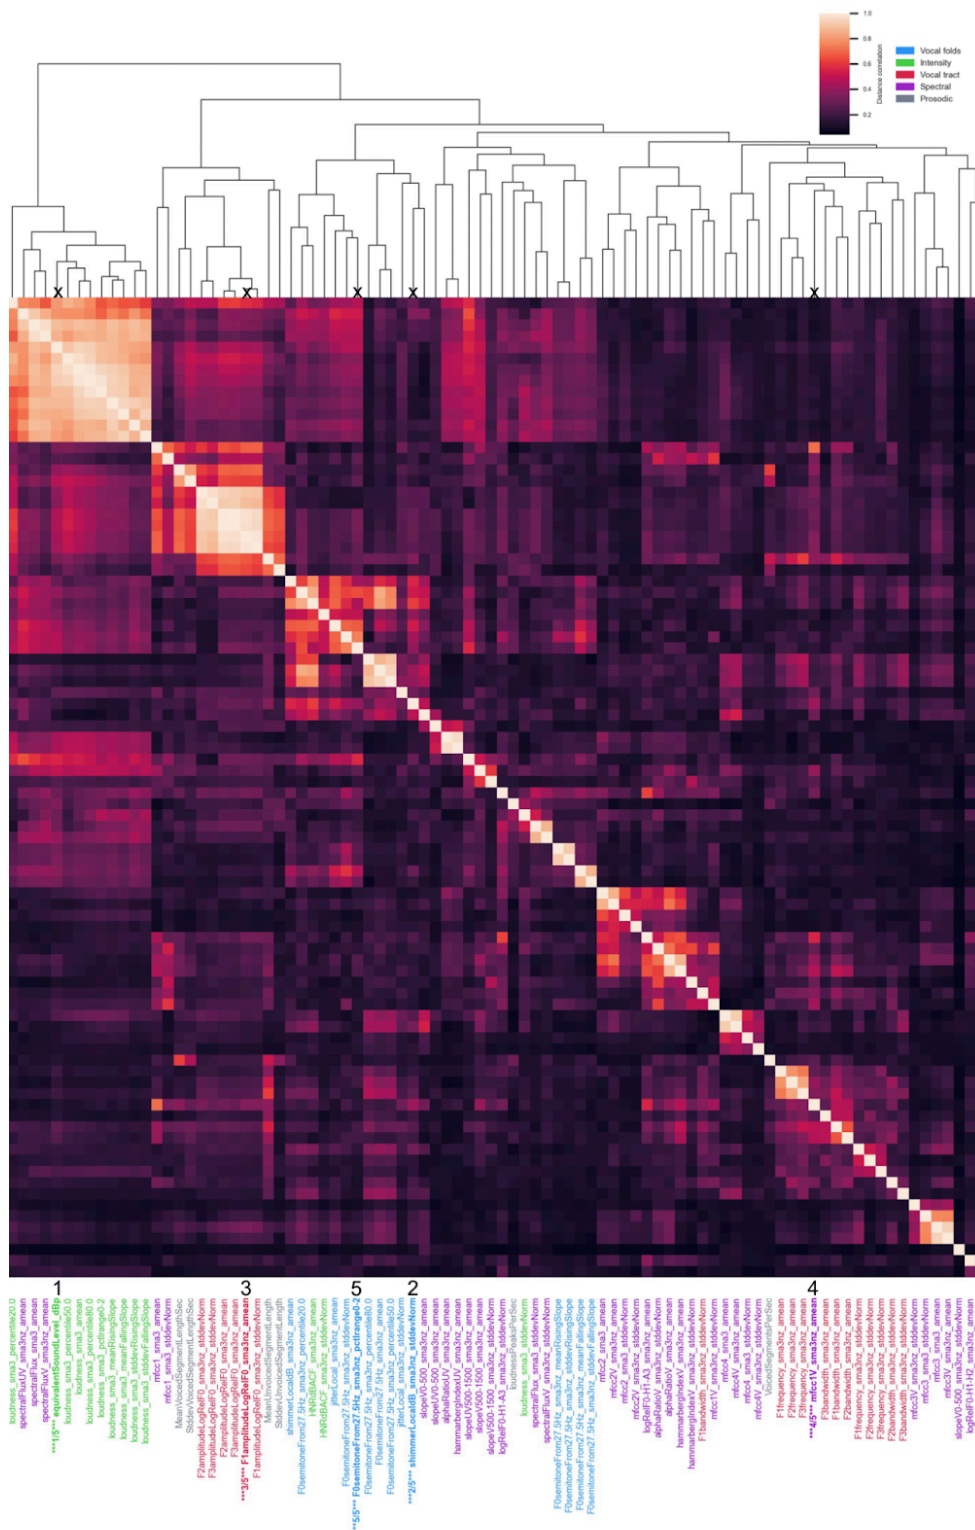

468

469 **Figure 6. Feature redundancy with top 5 features highlighted.** Top 5 features are highlighted in bold and  
470 their rank is displayed. Squares are clusters of redundant features. Computed with all participants on the  
471 reading task.

## 472 Clinician ratings

473 The median ROC AUC for humans was 0.78 (min. = 0.74 to max. = 0.81) meaning the  
474 machine learning models performed better than the highest performing clinician on the  
475 limited available data, that is, the audio samples of the reading task. Interestingly, using  
476 the average clinician's CAPE-V ratings within machine learning models was able to obtain  
477 a maximum median ROC AUC of 0.84 (0.72–0.92) with the Random Forest model (Table  
478 3). Using clinicians' perceptual ratings of background noise and recording loudness  
479 achieved a maximum median ROC AUC of 0.77 (.63–.87).

480 **Table 3. Performance using clinician ratings as variables for machine learning models**

|                    | Features | LogisticRegression | MLP                | RandomForest       | SGD                |
|--------------------|----------|--------------------|--------------------|--------------------|--------------------|
| CAPE-V             | 6        | .80 (.69–.88; .50) | .81 (.71–.90; .50) | .84 (.72–.92; .49) | .77 (.45–.92; .51) |
| Noise+<br>loudness | 2        | .76 (.59–.86; .50) | .77 (.63–.87; .50) | .73 (.62–.83; .52) | .64 (.45–.78; .50) |

481 Median ROC AUC score from 50 bootstrapping splits (90% confidence interval; median score of null model  
482 trained on permuted labels which should be at .50 if at chance).

483 In Figures 6 and 7 we report the inter-rater reliability (Flight's kappa and ICC) along with  
484 the distribution of the ratings. Common cutoffs for inter-rater agreement are poor for values  
485 less than .40, fair for values between .40 and .59, good for values between .60 and .74,  
486 and excellent for values between .75 and 1.0 (49). Background noise had poor reliability  
487 across rater, UVFP and recording loudness had fair reliability (see Figure 7) and  
488 CAPE-V-inspired ratings scored good to excellent except for pitch which was fair (see  
489 Figure 8).

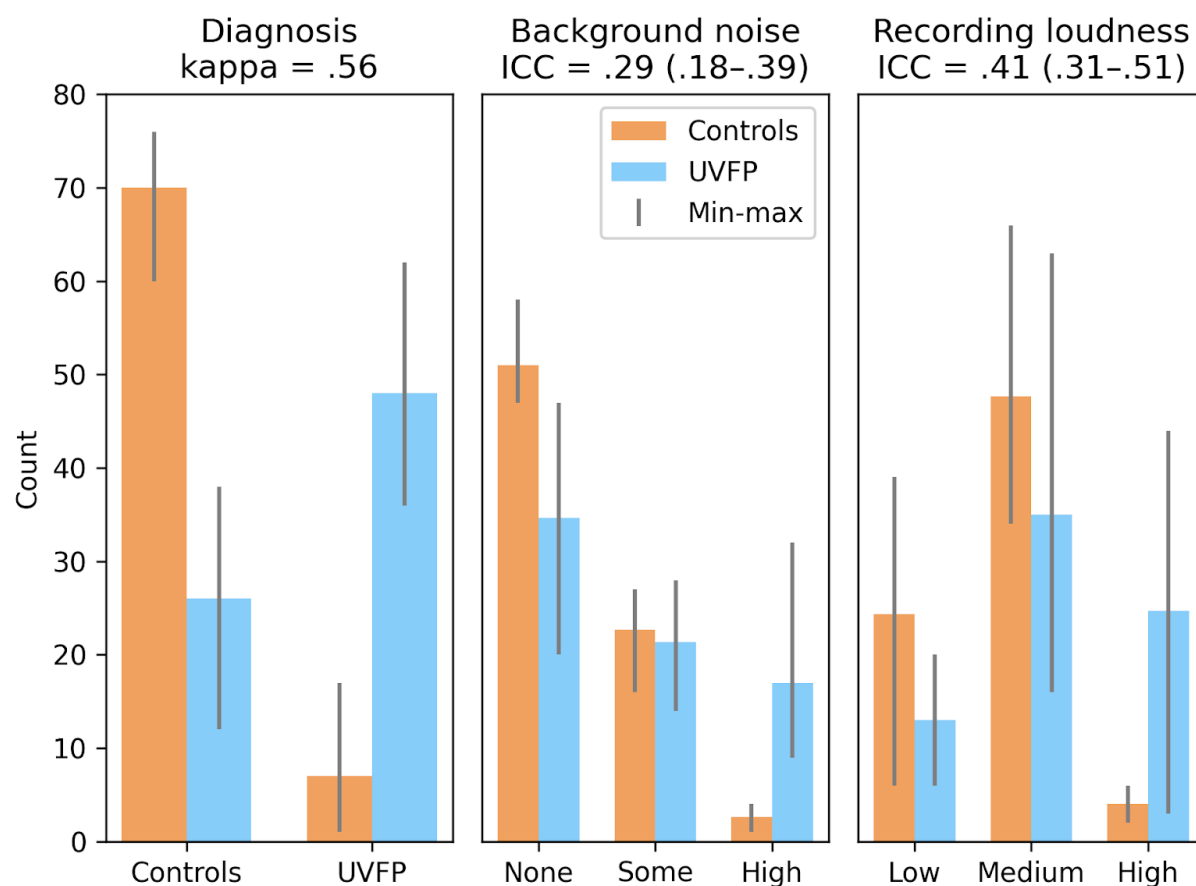

490

491 **Figure 7. Descriptive statistics and inter-rater reliability of clinician ratings for unilateral vocal fold**  
492 **paralysis (UVFP), background noise, and recording loudness indicating likely bias.** Controls and UVFP  
493 are ground truth diagnosis from the full clinical interview. Ratings are on brief reading samples. Bars indicate  
494 maximum and minimum count across the three raters. The disproportionate amount of UVFP samples rated  
495 as having high background noise and high loudness indicates likely bias, where the gain might have been  
496 raised for some UVFP patients and they may have phonated more intensely. kappa: Light's kappa; ICC:  
497 intra-class correlation coefficient.

498



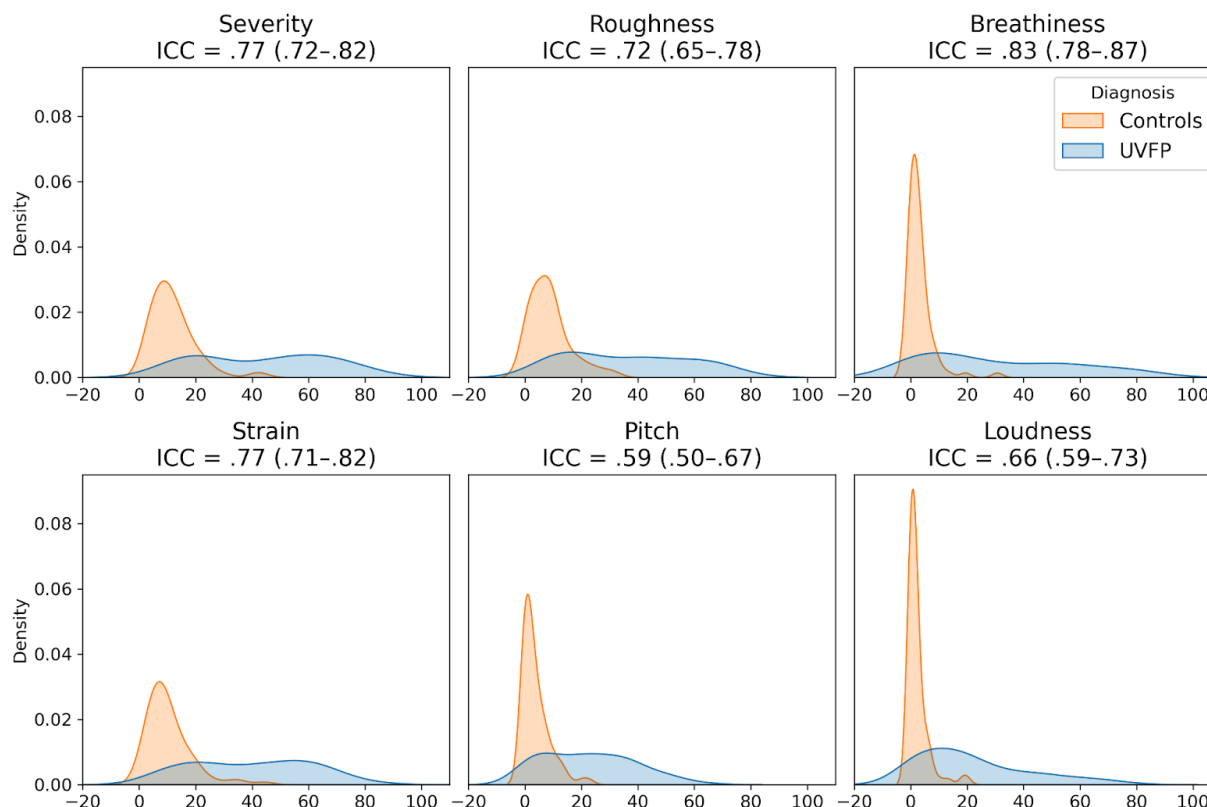

499

500 **Figure 8. How clinicians rate the audio recordings of read speech: descriptive statistics and**  
501 **inter-rater reliability of average clinician ratings.** The average across raters was taken for each recording.  
502 ICC: intra-class correlation coefficient.

503

504 Bias mitigation: matching audio duration and removing features associated to  
505 intensity

506 We trimmed the longer UVFP samples so they were matched to control samples (all samples were  
507 the same duration), removing the audio duration difference. Vowel samples could not be matched  
508 by trimming as some UVFP samples were shorter and some were longer than control samples;  
509 therefore we demonstrate an attempt at bias mitigation only with reading samples. In Table 4, we

510 show results on these samples after additionally removing all intensity features as well as variables  
511 that have a distance correlation (dcor) with any of them  $\geq 0.3$  and  $0.4$  based on the reading  
512 samples. Models have comparable performance to models with the original duration and  
513 intensity-related biases. See section "Biased features" and Table S4 in Sup. Mat. for a list of the 44  
514 features associated with audio duration and the 14 intensity related features. For distance  
515 correlations between audio duration and features, see Sup. Mat. Table S6.

516

517 **Table 4. Performance keeping features least associated with intensity features on samples**  
518 **of equal audio length after trimming.**

|          | Features | LogisticRegression | MLP                | RandomForest       | SGD                |
|----------|----------|--------------------|--------------------|--------------------|--------------------|
| dcor<0.4 | 44       | .88 (.80–.92; .50) | .87 (.81–.92; .47) | .87 (.78–.93; .45) | .83 (.76–.90; .48) |
| dcor<0.3 | 20       | .84 (.78–.89; .50) | .83 (.76–.9; .49)  | .85 (.78–.91; .53) | .79 (.66–.87; .51) |

519 Median ROC AUC score from 50 bootstrapping splits (90% confidence interval; median score of null model  
520 trained on permuted labels which should be at .50 if at chance).

521

## 522 Discussion

523 This study achieves high performance in detecting UVFP from healthy voices using a few  
524 seconds of audio recordings and surpassing clinician evaluations even after mitigating the  
525 biases we found in the dataset. As a result of performing the explainability analysis, we  
526 discovered a likely bias: intensity features were higher for UVFP patients than controls on  
527 average (Figure 5) when UVFP patients should have weaker voices. There are two likely  
528 causes. A first cause is that the software that had been used prompted users to speak

529 louder if they had a weak voice in order to achieve an audible recording. A second cause  
530 was supported by clinicians' ratings: clinicians rated UVFP patients as having louder  
531 recordings and more background noise than controls on average –when they should have  
532 similar levels–, which are proxies for microphone gain having been increased. This would  
533 have helped models improve performance using characteristics stemming from the  
534 recording idiosyncrasies instead of from pathophysiology. However, we removed features  
535 correlating with the clearly biased features and still achieved high performance.

536 Our study expands on prior studies which have used pre-existing commercial databases,  
537 smaller sample sizes, fewer features, and/or methods for model evaluation that can be  
538 biased in small datasets given the test sets may not be representative (for a discussion on  
539 bootstrapping for clinical datasets, see Figure 6<sup>(2)</sup>). Critically, we provide a roadmap for  
540 evaluating models more thoroughly including quantitatively explaining models and  
541 checking the robustness of the models to different choices of speech-eliciting tasks,  
542 algorithms, and feature sets. All of this should increase trust when no bias is found and  
543 when explanations are robust across models and make sense to experts. Such a model  
544 could fulfill several clinical needs: (1) postoperative screening for thyroid surgery-related  
545 UVFP since after thyroid surgery, UVFP is common, occurring in up to 5 to 10% of cases<sup>27</sup>.  
546 Furthermore, laryngoscopy is not readily available to all postoperative populations and  
547 symptomatic changes are notoriously variable. An ML-based screening could help identify  
548 patients needing further workup and treatment, and earlier diagnosis is essential to  
549 optimize long-term outcomes<sup>28,29</sup>. (2) Monitoring voice during speech therapy and after  
550 surgical treatment for confirmed UVFP to measure when and if the patient's voice is

551 approximating a healthy voice. (3) Preoperative screening prior to surgeries that are at  
552 high risk for developing UVFP such as thyroid, head and neck, cardiac, thoracic,  
553 esophageal, and cervical spine operations.

554 In Table 5 we summarize several key recommendations to avoid bias when building and  
555 explaining machine learning tools for laryngology, although more could be added, and we  
556 expand upon how we dealt with some of these steps in the following sections.

557

558 **Table 5. Recommendations to avoid bias for explainable machine learning models that use**  
 559 **audio recordings for screening in laryngology**

| Recommendations                             | Description                                                                                                                                                                                                                                                                                                                                                                                                                                                                                                                                                                                                                                                                                                                                                                                                                                                                                                                                                                                                                                                                                                                           |
|---------------------------------------------|---------------------------------------------------------------------------------------------------------------------------------------------------------------------------------------------------------------------------------------------------------------------------------------------------------------------------------------------------------------------------------------------------------------------------------------------------------------------------------------------------------------------------------------------------------------------------------------------------------------------------------------------------------------------------------------------------------------------------------------------------------------------------------------------------------------------------------------------------------------------------------------------------------------------------------------------------------------------------------------------------------------------------------------------------------------------------------------------------------------------------------------|
| Before data collection                      | - Pre-register hypotheses as to which variables should be important for predicting the target group to question effects that are not anticipated by theory (50)                                                                                                                                                                                                                                                                                                                                                                                                                                                                                                                                                                                                                                                                                                                                                                                                                                                                                                                                                                       |
| During recording                            | - In a <i>controlled</i> recording setting: models could use any unintended differences between groups to improve classification (demonstrated in our study); therefore, it is important to make sure microphone gain, background noise, instructions are consistent across participants and reflect how recordings will be done once deployed.<br>- In a <i>remote</i> setting: it is desirable that models work on people's mobile devices outside the clinic. Since we cannot fully control the recording procedure, we should make sure there are no biases affecting one group more than another, test pilot instructions, and collect much more data to weaken the effect of individual recording idiosyncrasies.<br>- Perform pilot studies to do an initial quality control<br>- Collect representative samples so models generalize to different protected groups (e.g., ages, genders, races) or provide appropriate warnings (51).<br>- Providing instructions so participants do not overproject their voice and control recording procedure so a minimum loudness threshold is not needed (as demonstrated in our study) |
| Preprocessing and exploratory data analysis | - Quality control: remove non-natural outliers due to measurement errors, wrong data collection, or wrong data entry (e.g., fixing mislabeled files, unexpected silent recordings, recordings with extreme much background noise)(52)<br>- Avoid or be cautious with preprocessing steps that might reduce the properties associated with the disorder (e.g., denoising may remove breathiness information which may be useful for prediction).<br>- Observe distribution of variables between groups (e.g., audio duration) to make sure there are no differences that are not intrinsic to the disorder. Extra inspection of the data should be taken with retrospective studies where recording protocols were not controlled as in our study.                                                                                                                                                                                                                                                                                                                                                                                     |
| During training and evaluation              | - Train multiple machine learning models of different complexity: two models may perform similarly but use input variables in different ways. If after training a model we only explain one of them, we might have biased conclusions of what variables characterize the disorder as we demonstrate.<br>- Avoid overfitting (i.e., finding patterns that do not generalize to new samples). Simple held-out test sets (e.g., of 20%) may not be representative of the population or the dataset, and therefore resampling methods (k-fold cross-validation, bootstrapping) are better. If performing hyperparameter tuning, nested resampling is needed to avoid overfitting (2). Avoid feature selection and dimensionality reduction using information from the test set/s. (38,53)<br>- Report performance on most and remaining important features as done in our study                                                                                                                                                                                                                                                           |
| During explainability analyses              | - Choosing one of the variables that are highly dependent due to collinearity (e.g., that correlate above 0.8 Spearman rho or dcor above a threshold that does not reduce performance as we did in this study) or due to multicollinearity (remove variables if variance inflation factor > 5 or 10) (54); grouping correlated variables using leave-one-feature-out (LOFO); obtaining one variable from the correlated variables through dimensionality reduction (without using the test set which could lead to overfitting).                                                                                                                                                                                                                                                                                                                                                                                                                                                                                                                                                                                                      |

|                     |                                                                                                                                                                                                                                                                                                                                                                                                                                                                                                                                                                                                                                                                                                                                                                                                                                |
|---------------------|--------------------------------------------------------------------------------------------------------------------------------------------------------------------------------------------------------------------------------------------------------------------------------------------------------------------------------------------------------------------------------------------------------------------------------------------------------------------------------------------------------------------------------------------------------------------------------------------------------------------------------------------------------------------------------------------------------------------------------------------------------------------------------------------------------------------------------|
|                     | <ul style="list-style-type: none"><li>- Make conclusions from the features that are robustly important <i>across</i> models; here we take the average importance rank weighted by model performance.</li><li>- Evaluate potential bias: do important features match hypotheses? Do they dissociate groups in the expected direction? Do certain recording conditions perform better than others and were these done for only one group? Does the model work worse for certain races or age groups? Several metrics can evaluate this (e.g., see packages AIF360, fairlearn, and EqualityML).</li><li>- Use expert ratings to evaluate any potential sources of bias as done in our study.</li><li>- Understandability: are the explanations understandable for the engineer, the clinician, and/or the patient? (55)</li></ul> |
| If bias is detected | <ul style="list-style-type: none"><li>- Use bias mitigation strategies either during pre-processing (removing variables generating the bias along with variables correlated with these ones), training (adversarial debiasing, prejudice remover), or evaluation (equalized odds, reject option classification) (56). See packages AIF360, fairlearn, and EqualityML.</li></ul>                                                                                                                                                                                                                                                                                                                                                                                                                                                |
| After deployment    | <ul style="list-style-type: none"><li>- Continuous assessment: we need to review predictions and re-assess accuracy once deployed as new environments and populations could change performance (i.e., dataset shift (57)).</li></ul>                                                                                                                                                                                                                                                                                                                                                                                                                                                                                                                                                                                           |

560

## 561 **Explaining acoustic features relevant to detecting vocal fold paralysis**

562 Objective acoustic measurement changes associated with vocal fold paralysis have been  
563 described and these changes include reduced loudness and maximum phonation time,  
564 higher perturbation measurements such as jitter and shimmer, and increased signal to  
565 noise ratio (19,58,59); however these were univariate models, and we have demonstrated  
566 that using single variables does not seem to provide high predictive performance. While  
567 other multivariate machine learning models have been used, these used few features and  
568 small or undefined samples and only report feature importance results for one model;  
569 therefore it is not clear whether the important features reported would hold using larger  
570 feature sets or how other models would perform. Using a much larger initial set of acoustic  
571 features for analysis, we demonstrate that several machine learning algorithms of  
572 increasing complexity (using more parameters) identify vocal fold paralysis from healthy

573 voices. We also report that these models can use different features to achieve similar  
574 performance. Different models emphasize different features not simply because of its  
575 relevance to a disorder, but because of the mathematics associated with the model (e.g.,  
576 containing different degrees of interaction effects, regularization, or propensity to  
577 underfitting or overfitting) (60). The variability of the ranking of features used by our  
578 individual models also illustrates the potential danger of using the single highest  
579 performing model, which is commonly seen in published literature.

580 Instead of simply reporting the important features from the highest performing model, we  
581 analyzed the models to find common features. The most important features across models  
582 were somewhat associated with intensity features (Sup. Mat. Table S5); therefore, even if  
583 not strongly associated with intensity features, they could be important due to a  
584 combination of intrinsic differences between UVFP and controls for which we provide  
585 hypotheses or because of how intensity influences them; a new unbiased dataset would be  
586 needed to confirm this. These top features were: intensity, especially equivalent sound  
587 pressure level which was redundant with multiple loudness features and seems to be due  
588 to some patients trying to use more breath for projection or being recorded with a higher  
589 microphone gain; Mel Frequency Cepstral Coefficients (especially the first coefficient,  
590 which captures spectral envelope or slope, which has been shown to be important for  
591 predicting UVFP ((29)); mean F0 semitones given F0 originates from vocal-fold oscillation,  
592 a vocal-fold paralysis is expected to alter F0, and has been shown to help predict  
593 pathological speech including UVFP (28);, mean F1 amplitude and frequency, influenced  
594 by how the vocal tract filters F0 and the shape of the glottal pulse which would be affected

595 by UVFP voiced and unvoiced segments (prosodic and speech articulation features which  
596 may be altered due to changes in the periodicity of F0), and CPP features (which indicate  
597 voice quality degradations that could include more breathiness, a typical feature of UVFP  
598 (61)). Shimmer variability was important just for reading, and it captures variability in glottal  
599 pulses and pressure patterns which ultimately affect F0 and has been found to be  
600 significantly different between UVFP and a control group (62). When we removed the top 5  
601 features from the full feature set, performance is practically equivalent to using 88 features,  
602 as expected, since there are features that are redundant with the top 5 features. Therefore,  
603 it is not that only these 5 specific features drive performance, but rather the information  
604 they contain, which in this dataset is also captured by other features as shown in Figure 6.

605 These acoustic features would corroborate our clinical understanding of glottal  
606 incompetence from UVFP and with common patient complaints of reduced loudness, vocal  
607 instability, hoarseness, and rough voice; however, they could also be important due to their  
608 associations with intensity features. Uncovering and understanding the basic mechanisms  
609 and features that models use to generate predictions and outcomes are important as these  
610 tools become part of the clinical decision making process.

### 611 **Identifying and addressing bias**

612 Equivalent Sound Level was higher in UVFP patients than controls. This is counter-intuitive  
613 because UVFP patients are known to have softer voices as already described; however,  
614 clinicians rated most UVFP samples as being louder than controls. The bias discovered  
615 was likely due to increasing the gain on the microphone for some UVFP patients, which



616 would explain the increased background noise in UVFP patients' recordings. A second  
617 source of bias may have occurred from requesting UVFP patients to speak louder in order  
618 to meet the minimum intensity threshold on the recording softwares Computerized Speech  
619 Lab™ and OperaVOX, or patients could have tried this on their own knowing they were  
620 being recorded. This behavioral compensation is likely to occur in biomarker research  
621 when the participant has a soft voice, especially in retrospective studies like ours where  
622 the study goal is not known at the time of recording or when certain software properties  
623 lead individuals with weak voices to speak louder. Even though the current models perform  
624 better than the clinicians, a systematic comparison would require more clinician and model  
625 assessments across datasets. It is likely a model trained on a single dataset might learn  
626 intrinsic characteristics of that dataset that do not generalize as well as clinical expertise  
627 might.

628 Having said this, this line of research would help us understand the extent to which UVFP  
629 detection is generalizable from acoustic data alone. Finding an objective measure of  
630 hoarseness is important given a "normal voice" is a fundamentally subjective classification  
631 that is not well defined (63,64) and varies with training (65,66), which may result in low  
632 reliability of evaluation of disordered voices among clinical rating scales (67).

633 As a post hoc analysis, we address bias by trying to mitigate its effect: we removed  
634 variables associated with intensity variables on samples matched on audio duration. After  
635 removing these features, the models were able to obtain similar performance using a very  
636 different set of features. It is possible that these remaining features better reflect

637 pathophysiology or that the features extracted are still influenced by intensity, but further  
638 studies should address their generalizability or their relation to intensity variation.

### 639 **Evaluating the sensitivity to tasks, model complexity, and features used**

640 In addition to getting a better understanding of features, we explored performance in the  
641 context of different vocal tasks. Participants carried out two different tasks to elicit voice,  
642 *reading*, which captures more complex speech dynamics, and *sustaining vowels*, which is  
643 a simpler measure of vocalization and the respiratory subsystem. Overall, these dynamics  
644 from the speech task may have improved model performance as was observed.

645 Comparing simpler and more complex models is important because simpler models such  
646 as Logistic Regression could be preferred because they tend to generalize better given  
647 they are less at risk for overfitting the training set and they are more interpretable and thus  
648 biases can be assessed more directly (68).

649 By removing redundant features, we can concentrate on finding the most useful features  
650 for further analysis. Performance decreased only slightly while we made models more  
651 parsimonious and explainable. This approach is key given the curse of dimensionality in  
652 machine learning that may make models unnecessarily complex and harder to generalize  
653 (20).

654 Often studies will report the top N features but not how predictive they are in isolation. In  
655 our study we ran models on the top 5 features together (Table 2). The lower performance  
656 of these top 5 features relative to a richer feature set helps demonstrate that model

657 performance is dependent on interactions across multiple additional features (with the  
658 exception of samples from the reading task which obtained an AUC of 0.86 using just the 5  
659 features). We also ran models without top 5 features to demonstrate that leaving features  
660 that are redundant with these top features results in almost equivalent high performance to  
661 using all 88 features since the redundant features share information. Furthermore, when  
662 training models on the individual features from within these top 5 one at a time, the  
663 performance was reduced considerably with scores from 0.55 to 0.71. This indicates the  
664 need for these models to combine multiple features to achieve high performance and any  
665 model evaluation should not focus on only the common or top features without testing their  
666 predictive performance.

## 667 **Limitations and future directions**

668 We cannot determine how the bias will affect the model's performance on future samples,  
669 but it will likely underperform in samples where length was not different between groups,  
670 where gain cannot be changed, and where participants are instructed to not overproject  
671 their voice; however, it is possible the model could underperform for other reasons  
672 including dataset shift (e.g., the distribution of voice characteristics or demographics is  
673 different in a new sample).

674 The classification using just duration itself varied across models and clinicians who  
675 listened to the reading passage in its entirety did not achieve as good a classification as  
676 the best performing models. Duration itself was not included as a feature in the  
677 eGeMaps-based models and has a complex effect on both machines and humans. For

678 example, duration could have affected eGeMAPS features (e.g, introduce more variability  
679 to the functionals that are computed over sliding time windows) and duration of vowels  
680 varied extensively across the UVFP group thus cannot itself be tied to underlying  
681 pathophysiology. Therefore, important future work should analyze how duration may affect  
682 these features, should address the intrinsic variability in durations of UVFP patients in  
683 responding to speech items, and should incorporate models of production that include a  
684 consideration of respiratory capabilities, articulation changes, and vocal fold  
685 pathophysiology.

686 It is not clear whether these models could detect UVFP from other voice disorders or just  
687 healthier voices; however, a model that generalizes well in classifying UVFP from controls  
688 could be used to monitor UVFP patients remotely and affordably during treatment or detect  
689 risk for UVFP when it is the most likely cause (e.g., dysphonia after thyroid surgery).

690 Larger sample sizes with curated examinations can help increase diverse representation  
691 across voice quality and thereby potentially reduce bias in classifier performance. We did  
692 not analyze potential racial bias given this data was not extracted from the chart review.

693 Our choice of a standardized feature set worked well in this setting, but may fail to work for  
694 differential voice disorder diagnosis or when generalizing to larger datasets, which may  
695 bring in additional sources of variance unaccounted for in this dataset. With the availability  
696 of more data, additional features could be extracted that better capture changes in  
697 coordination (e.g., XCORR (69)).

698 Furthermore, while our feature importance evaluation method, SHAP, shows a certain  
699 amount of robustness across models, alternative model-agnostic feature-importance

700 methods (e.g., LOFO, permutation importance) as well as model-specific methods  
701 (coefficient values for linear models, mean decrease in impurity for Random Forest) could  
702 be compared. Model understandability –how easily are the explanations understood by a  
703 speech scientist or a clinician– could be assessed rigorously (55).  
704 Finally, debiasing the models by removing features correlated with the biased ones was  
705 attempted although it is not clear how exactly intensity may influence certain features; we  
706 assume if intensity is influencing a variable, it generally should create some considerable  
707 association which we discarded using dcor. Therefore, the effect of the bias can be  
708 assessed by testing the model's generalizability to new unbiased datasets. Therefore, we  
709 are not promoting our final debiased models as completely unbiased or ready to use, it is  
710 possible our debiasing strategies are only partially effective, additional biases remain,  
711 and/or additional ways of debiasing have not been considered.  
712 We tested how well a model using only the top 5 features performed independently of the  
713 model with all features; it is possible to also test how well the incremental set of top  
714 features performs (1st, 1st and 2nd, 1st–3rd, etc.), which would be useful in order to  
715 compare different models' performance as a function of which features are being used.

## 716 **Conclusion**

717 Using one of the largest UVFP datasets to date, our study demonstrates the importance of  
718 checking for biases using explainable machine learning and clinician perceptual ratings. In  
719 order to first explain models, we tackle collinearity (i.e., redundant or highly correlated  
720 independent variables), which biases feature importance, using a custom method called

721 Independence Factor that selects one out of a set of associated features without losing  
722 predictive performance. We then compare how results change across different  
723 speech-eliciting tasks, training algorithms, features, features set sizes, and highest and  
724 lowest performing features to better understand the process that models use to predict  
725 vocal changes associated with laryngeal disease, since analyzing a single model will result  
726 in a biased view of how predictions are achieved. During this process, we discovered there  
727 was a difference in audio duration between groups clearly not related to intrinsic  
728 differences in UVFP speech rate, but in cropping all control recordings to a certain length  
729 during audio storage. We also discovered that sound equivalent level was  
730 counterintuitively higher in UVFP patients, a likely bias resulting from the weak or  
731 underprojected voice that characterizes many UVFP patients: patients were prompted by  
732 the recording software to speak louder and the microphone gain was likely raised  
733 selectively for these patients with weaker voices, possibly generating higher background  
734 noise which was detected through clinician's ratings; therefore the models picked up on  
735 the acoustic correlates of this increased intensity, which would impede generalization  
736 under different recording procedures and natural audio durations. This is more likely to  
737 occur in laryngology datasets when patients have a softer voice.

738 Interestingly, we found that matching audio duration between groups and removing all  
739 variables that were clearly related to intensity (e.g., bias mitigation) resulted in similar high  
740 performance. In this case, the model may be using information more related to  
741 pathophysiology, which would need to be further confirmed by future unbiased samples.  
742 Machine learning models tended to surpass clinician's evaluation of the same audio

743 recordings. Interestingly, using clinician's voice quality ratings on the recordings in machine  
744 learning models performed better than their binary evaluation on whether recordings  
745 contained a sample of UVFP voice or not.

746 We hope to promote moving beyond using a single model and only reporting top features  
747 to a better explanation of how these models work as well as being able to understand  
748 variance across modeling and evaluation choices. We believe these are all aspects of  
749 machine learning that clinicians need to understand prior to using such applications.

750 With these considerations along with the recommendations we make, machine learning  
751 applications could aid in laryngology screening, allowing for the potential development of  
752 in-home screening assessments and continuous pre- and post-treatment monitoring.

### 753 **Acknowledgments**

754 We would like to thank Cody Sullivan and Carolyn Hsu for their help in rating the audio  
755 samples and thank Daryush Mehta, Robert Hillman, and John Guttag for their feedback on  
756 an earlier version of this study. DML was supported by a National Institute on Deafness  
757 and Other Communication Disorders T32 training grant [5T32DC000038-28], a RallyPoint  
758 Fellowship, and an Amelia Peabody Professional Development Award. The work was  
759 supported by a gift to the McGovern Institute for Brain Research at MIT. SSG was partially  
760 supported by National Institutes of Health grants for the development of pydra-ml [R01  
761 EB020740], for reproducible practices [P41 EB019936], and the Bridge2AI voice data  
762 generation project [1OT2OD032720-01]. The authors declare that there is no conflict of

763 interest.

764

## 765 **Data Availability Statement**

766 All data and code are available through Github (<https://github.com/danielmlow/vfp>) and

767 Zenodo (<https://doi.org/10.5281/zenodo.5009208>) including a tutorial to test our models on

768 your own data ([https://github.com/danielmlow/vfp/blob/main/vfp\\_detector.ipynb](https://github.com/danielmlow/vfp/blob/main/vfp_detector.ipynb)).

769

## 770 **Author Contributions**

771 Daniel M. Low: Data curation, Methodology, Formal analysis, Software, Writing - Original

772 Draft; Vishwanatha Rao: Data Curation, Formal analysis, Writing - Original Draft; Gregory

773 Randolph: Writing - Review & Editing; Philip C. Song: Conceptualization, Methodology,

774 Writing - Original Draft, Supervision, Data curation; Satrajit S. Ghosh: Conceptualization,

775 Methodology, Writing - Original Draft, Supervision, Software

776

## 777 **References**

778 1. Wroge TJ, Özkanca Y, Demiroglu C, Si D. Parkinson's disease diagnosis using machine learning and  
779 voice. 2018 IEEE signal [Internet]. 2018.

780 2. Low DM, Bentley KH, Ghosh SS. Automated assessment of psychiatric disorders using speech: A  
781 systematic review. Laryngoscope Investig Otolaryngol. 2020 Feb;5(1):96–116.

782 3. Quatieri TF. Discrete-Time Speech Signal Processing: Principles and Practice. Pearson Education;  
783 2008. 816 p.

784 4. Molnar C. Interpretable Machine Learning. Lulu.com; 2019. 319 p.

785 5. Stachler RJ, Francis DO, Schwartz SR, Damask CC, Digoy GP, Krouse HJ, et al. Clinical practice  
786 guideline: Hoarseness (dysphonia) (update). Otolaryngol Head Neck Surg. 2018  
787 Mar;158(1\_suppl):S1–42.



- 788 6. Brunner E, Friedrich G, Kiesler K, Chibidziura-Priesching J, Gugatschka M. Subjective breathing  
789 impairment in unilateral vocal fold paralysis. *Folia Phoniatr Logop.* 2011;63(3):142–6.
- 790 7. Spataro EA, Grindler DJ, Paniello RC. Etiology and Time to Presentation of Unilateral Vocal Fold  
791 Paralysis. *Otolaryngol Head Neck Surg.* 2014 Aug;151(2):286–93.
- 792 8. Sritharan N, Chase M, Kamani D. The vagus nerve, recurrent laryngeal nerve, and external branch of  
793 the superior laryngeal nerve have unique latencies allowing for intraoperative documentation of .... The  
794 [Internet]. 2015.
- 795 9. Randolph GW, Kamani D. The importance of preoperative laryngoscopy in patients undergoing  
796 thyroidectomy: voice, vocal cord function, and the preoperative detection of invasive thyroid malignancy.  
797 *Surgery.* 2006 Mar;139(3):357–62.
- 798 10. Colton RH, Paseman A, Kelley RT, Stepp D, Casper JK. Spectral moment analysis of unilateral vocal  
799 fold paralysis. *J Voice.* 2011 May;25(3):330–6.
- 800 11. Balasubramaniam RK, Bhat JS, Fahim S 3rd, Raju R 3rd. Cepstral analysis of voice in unilateral  
801 adductor vocal fold palsy. *J Voice.* 2011 May;25(3):326–9.
- 802 12. Little M, Costello D, Harries M. Objective dysphonia quantification in vocal fold paralysis: comparing  
803 nonlinear with classical measures. *Nature Precedings.* 2009 Apr 21;1–1.
- 804 13. Bielowicz S, Stager SV. Diagnosis of unilateral recurrent laryngeal nerve paralysis: laryngeal  
805 electromyography, subjective rating scales, acoustic and aerodynamic measures. *Laryngoscope.* 2006  
806 Mar;116(3):359–64.
- 807 14. Hartl DAM, Hans S, Vaissière J, Brasnu DAMF. Objective acoustic and aerodynamic measures of  
808 breathiness in paralytic dysphonia. *Eur Arch Otorhinolaryngol.* 2003 Apr;260(4):175–82.
- 809 15. Francis DO, Pearce EC, Ni S, Garrett CG, Penson DF. Epidemiology of vocal fold paralyses after total  
810 thyroidectomy for well-differentiated thyroid cancer in a Medicare population. *Otolaryngol Head Neck  
811 Surg.* 2014 Apr;150(4):548–57.
- 812 16. Jeannon JP, Orabi AA, Bruch GA, Abdalsalam HA, Simo R. Diagnosis of recurrent laryngeal nerve palsy  
813 after thyroidectomy: a systematic review. *Int J Clin Pract.* 2009 Apr;63(4):624–9.
- 814 17. Bhattacharyya N, Kotz T, Shapiro J. Dysphagia and aspiration with unilateral vocal cord immobility:  
815 incidence, characterization, and response to surgical treatment. *Ann Otol Rhinol Laryngol.* 2002  
816 Aug;111(8):672–9.
- 817 18. Pinho CMR, Jesus LMT, Barney A. Aerodynamic measures of speech in unilateral vocal fold paralysis  
818 (UVFP) patients. *Logoped Phoniatr Vocol.* 2013 Apr;38(1):19–34.
- 819 19. Hartl DM, Crevier-Buchman L, Vaissière J, Brasnu DF. Phonetic effects of paralytic dysphonia. *Ann Otol  
820 Rhinol Laryngol.* 2005 Oct;114(10):792–8.
- 821 20. Berisha, V., Krantsevich, C., Hahn, P. R., Hahn, S., Dasarathy, G., Turaga, P., & Liss, J. Digital medicine  
822 and the curse of dimensionality. *NPJ Digital Medicine.* 2021 Dec;4(1):s41746–021.
- 823 21. Ruz J, Švihlík J, Krýže P, Novotný M, Tykalová T. Reproducibility of Voice Analysis with Machine  
824 Learning. *Mov Disord.* 2021 May;36(5):1282–3.
- 825 22. Schönweiler R, Hess M, Wübbelt P, Ptok M. Novel approach to acoustical voice analysis using artificial  
826 neural networks. *J Assoc Res Otolaryngol.* 2000 Dec;1(4):270–82.

- 827 23. Godino-Llorente JI, Gómez-Vilda P. Automatic detection of voice impairments by means of short-term  
828 cepstral parameters and neural network based detectors. *IEEE Trans Biomed Eng.* 2004  
829 Feb;51(2):380–4.
- 830 24. Fraile R, Saenz-Lechon N, Godino-Llorente JI, Osma-Ruiz V, Fredouille C. Automatic detection of  
831 laryngeal pathologies in records of sustained vowels by means of mel-frequency cepstral coefficient  
832 parameters and differentiation of patients by sex. *Folia Phoniatr Logop.* 2009;61(3):146–52.
- 833 25. Voigt D, Döllinger M, Yang A, Eysholdt U, Lohscheller J. Automatic diagnosis of vocal fold paresis by  
834 employing phonovibrogram features and machine learning methods. *Comput Methods Programs  
835 Biomed.* 2010 Sep;99(3):275–88.
- 836 26. Lopes LW, Batista Simões L, Delfino da Silva J, da Silva Evangelista D, da Nóbrega E Ugulino AC,  
837 Oliveira Costa Silva P, et al. Accuracy of Acoustic Analysis Measurements in the Evaluation of Patients  
838 With Different Laryngeal Diagnoses. *J Voice.* 2017 May;31(3):382.e15–382.e26.
- 839 27. Powell ME, Rodriguez Cancio M, Young D, Nock W, Abdelmessih B, Zeller A, et al. Decoding phonation  
840 with artificial intelligence (DeP AI): Proof of concept. *Laryngoscope Investig Otolaryngol.* 2019  
841 Jun;4(3):328–34.
- 842 28. Dibazar AA, Narayanan S, Berger TW. Feature analysis for automatic detection of pathological speech.  
843 In: *Proceedings of the Second Joint 24th Annual Conference and the Annual Fall Meeting of the  
844 Biomedical Engineering Society* [Engineering in Medicine and Biology. 2002. p. 182–3 vol.1.
- 845 29. Seedat N, Aharonson V, Hamzany Y. Automated and interpretable m-health discrimination of vocal cord  
846 pathology enabled by machine learning. In: *2020 IEEE Asia-Pacific Conference on Computer Science  
847 and Data Engineering (CSDE).* 2020. p. 1–6.
- 848 30. Mittal V, Sharma RK. Deep Learning Approach for Voice Pathology Detection and Classification. *IJHISI.*  
849 2021 Oct 1;16(4):1–30.
- 850 31. Hu HC, Chang SY, Wang CH, Li KJ, Cho HY, Chen YT, et al. Deep Learning Application for Vocal Fold  
851 Disease Prediction Through Voice Recognition: Preliminary Development Study. *J Med Internet Res.*  
852 2021 Jun 8;23(6):e25247.
- 853 32. Ras G, Xie N, van Gerven M, Doran D. Explainable Deep Learning: A Field Guide for the Uninitiated.  
854 *jair.* 2022 Jan 25;73:329–96.
- 855 33. Fairbanks G. *Voice and Articulation Drillbook.* Harper; 1960. 196 p.
- 856 34. Eyben F, Scherer KR, Schuller BW, Sundberg J, André E, Busso C, et al. The Geneva Minimalistic  
857 Acoustic Parameter Set (GeMAPS) for Voice Research and Affective Computing. *IEEE Transactions on  
858 Affective Computing.* 2016 Apr;7(2):190–202.
- 859 35. audEERING GmbH. openSMILE (Version 2.3) [Internet]. 2017. Available from:  
860 [https://github.com/naxingyu/opensmile/blob/3a0968e7b36c1b730a4ffd2977031091ee9abf](https://github.com/naxingyu/opensmile/blob/3a0968e7b36c1b730a4ffd2977031091ee9abf7f/config/gemaps/eGeMAPSv01a.conf)  
861 [7f/config/gemaps/eGeMAPSv01a.conf](https://github.com/naxingyu/opensmile/blob/3a0968e7b36c1b730a4ffd2977031091ee9abf7f/config/gemaps/eGeMAPSv01a.conf)
- 862 36. Satrajit S Ghosh, Daniel M Low, Hoda Rajaei et al. Pydra-ML doi:10.5281/ZENODO.4170850 [Internet].  
863 Available from: <https://github.com/nipype/pydra-ml>
- 864 37. Lipton ZC. The Mythos of Model Interpretability: In machine learning, the concept of interpretability is  
865 both important and slippery. *Queueing Syst.* 2018 Jun 1;16(3):31–57.
- 866 38. Raschka S. *Model Evaluation, Model Selection, and Algorithm Selection in Machine Learning* [Internet].

- 867 arXiv [cs.LG]. 2018. Available from: <http://arxiv.org/abs/1811.12808>
- 868 39. Ojala M, Garriga GC. Permutation Tests for Studying Classifier Performance. In: 2009 Ninth IEEE  
869 International Conference on Data Mining. IEEE; 2009. p. 1833–63.
- 870 40. Lundberg S, Lee SI. A Unified Approach to Interpreting Model Predictions [Internet]. arXiv [cs.AI]. 2017.  
871 Available from: <http://arxiv.org/abs/1705.07874>
- 872 41. D'Amour A, Heller K, Moldovan D, Adlam B, Alipanahi B, Beutel A, et al. Underspecification presents  
873 challenges for credibility in modern machine learning. *J Mach Learn Res*. 2022 Jan 1;23(1):10237–97.
- 874 42. de Siqueira Santos S, Takahashi DY, Nakata A, Fujita A. A comparative study of statistical methods  
875 used to identify dependencies between gene expression signals. *Brief Bioinform*. 2014  
876 Nov;15(6):906–18.
- 877 43. Székely GJ, Rizzo ML, Bakirov NK. Measuring and testing dependence by correlation of distances.  
878 2007.
- 879 44. Hillenbrand J, Houde RA. Acoustic correlates of breathy vocal quality: dysphonic voices and continuous  
880 speech. *J Speech Hear Res*. 1996 Apr;39(2):311–21.
- 881 45. Murton O, Hillman R, Mehta D. Cepstral Peak Prominence Values for Clinical Voice Evaluation. *Am J*  
882 *Speech Lang Pathol*. 2020 Aug 4;29(3):1596–607.
- 883 46. G. Degottex, J. Kane, T. Drugman, T. Raitio and S. Scherer. COVAREP—A collaborative voice analysis  
884 repository for speech technologies. *Proc IEEE Int Conf Acoust Speech Signal Process [Internet]*. 2014  
885 [cited 2023 Oct 21].
- 886 47. Hallgren KA. Computing Inter-Rater Reliability for Observational Data: An Overview and Tutorial. *Tutor*  
887 *Quant Methods Psychol*. 2012;8(1):23–34.
- 888 48. Gamer M, Lemon J, Gamer MM, Robinson A, Kendall's W. Package "irr." Various coefficients of  
889 interrater reliability and agreement. 2012;22:1–32.
- 890 49. Cicchetti DV. Guidelines, criteria, and rules of thumb for evaluating normed and standardized  
891 assessment instruments in psychology. *Psychol Assess*. 1994 Dec;6(4):284–90.
- 892 50. Nosek BA, Ebersole CR, DeHaven AC, Mellor DT. The preregistration revolution [Internet]. Vol. 115,  
893 *Proceedings of the National Academy of Sciences*. 2018. p. 2600–6. Available from:  
894 <http://dx.doi.org/10.1073/pnas.1708274114>
- 895 51. Mehrabi N, Morstatter F, Saxena N, Lerman K, Galstyan A. A Survey on Bias and Fairness in Machine  
896 Learning. *ACM Comput Surv*. 2021 Jul 13;54(6):1–35.
- 897 52. Osborne JW, Overbay A. The power of outliers (and why researchers should ALWAYS check for them).  
898 *Practical Assessment, Research, and Evaluation*. 2019;9(1):6.
- 899 53. Kapoor S, Cantrell E, Peng K, Pham TH, Bail CA, Gundersen OE, et al. REFORMS: Reporting  
900 Standards for Machine Learning Based Science [Internet]. arXiv [cs.LG]. 2023. Available from:  
901 <http://arxiv.org/abs/2308.07832>
- 902 54. Thompson CG, Kim RS, Aloe AM, Becker BJ. Extracting the Variance Inflation Factor and Other  
903 Multicollinearity Diagnostics from Typical Regression Results. *Basic Appl Soc Psych*. 2017 Mar  
904 4;39(2):81–90.
- 905 55. Zhou Y, Ribeiro MT, Shah J. ExSum: From Local Explanations to Model Understanding [Internet]. arXiv

- 906 [cs.CL]. 2022. Available from: <http://arxiv.org/abs/2205.00130>
- 907 56. Hort M, Chen Z, Zhang JM, Harman M, Sarro F. Bias Mitigation for Machine Learning Classifiers: A  
908 Comprehensive Survey. *ACM J Responsib Comput [Internet]*. 2023 Nov 1; Available from:  
909 <https://doi.org/10.1145/3631326>
- 910 57. Dockès J, Varoquaux G, Poline JB. Preventing dataset shift from breaking machine-learning biomarkers.  
911 *Gigascience [Internet]*. 2021 Sep 28;10(9).
- 912 58. Ramig LA, Scherer RC, Titze IR, Ringel SP. Acoustic analysis of voices of patients with neurologic  
913 disease: rationale and preliminary data. *Ann Otol Rhinol Laryngol*. 1988 Mar-Apr;97(2 Pt 1):164–72.
- 914 59. Morsomme D, Jamart J, Wéry C, Giovanni A, Remacle M. Comparison between the GIRBAS Scale and  
915 the Acoustic and Aerodynamic Measures Provided by EVA for the Assessment of Dysphonia following  
916 Unilateral Vocal Fold Paralysis. *Folia Phoniatr Logop*. 2001 Nov-Dec;53(6):317–25.
- 917 60. Kriegeskorte N, Douglas PK. Interpreting encoding and decoding models. *Curr Opin Neurobiol*. 2019  
918 Apr;55:167–79.
- 919 61. Hartl DM, Hans S, Vaissière J, Riquet M, Brasnu DF. Objective voice quality analysis before and after  
920 onset of unilateral vocal fold paralysis. *J Voice*. 2001 Sep;15(3):351–61.
- 921 62. Ma Y, Xu X, Hou G, Zhou L, Zhuang P. Acoustic analysis in patients with unilateral arytenoid dislocation  
922 and unilateral vocal fold paralysis. *Lin Chung Er Bi Yan Hou Tou Jing Wai Ke Za Zhi*. 2016  
923 Feb;30(4):268–71.
- 924 63. Misono S. The Voice and the Larynx in Older Adults: What's Normal, and Who Decides? *JAMA*  
925 *Otolaryngol Head Neck Surg*. 2018 Jul 1;144(7):572–3.
- 926 64. Eadie T, Sroka A, Wright DR, Merati A. Does knowledge of medical diagnosis bias auditory-perceptual  
927 judgments of dysphonia? *J Voice*. 2011 Jul;25(4):420–9.
- 928 65. Helou LB, Solomon NP, Henry LR, Coppit GL, Howard RS, Stojadinovic A. The role of listener  
929 experience on Consensus Auditory-perceptual Evaluation of Voice (CAPE-V) ratings of  
930 postthyroidectomy voice. *Am J Speech Lang Pathol*. 2010 Aug;19(3):248–58.
- 931 66. Eadie TL, Baylor CR. The effect of perceptual training on inexperienced listeners' judgments of  
932 dysphonic voice. *J Voice*. 2006 Dec;20(4):527–44.
- 933 67. Karnell MP, Melton SD, Childes JM, Coleman TC, Dailey SA, Hoffman HT. Reliability of clinician-based  
934 (GRBAS and CAPE-V) and patient-based (V-RQOL and IPVI) documentation of voice disorders. *J*  
935 *Voice*. 2007 Sep;21(5):576–90.
- 936 68. Rudin C. Stop Explaining Black Box Machine Learning Models for High Stakes Decisions and Use  
937 Interpretable Models Instead. *Nat Mach Intell*. 2019 May;1(5):206–15.
- 938 69. Williamson JR, Quatieri TF, Helfer BS, Ciccarelli G, Mehta DD. Vocal and Facial Biomarkers of  
939 Depression based on Motor Incoordination and Timing. In: *Proceedings of the 4th International*  
940 *Workshop on Audio/Visual Emotion Challenge*. New York, NY, USA: Association for Computing  
941 Machinery; 2014. p. 65–72. (AVEC '14).
- 942
